# Supplementary material for: Two pairs of enantiomeric α-pyrone dimers from the endophytic fungus Phoma sp. YN02-P-3
Source: Royal Society of Chemistry journal article supplement (doi:10.1039/c6ra26319d), 2017-01-01

# Supplementary Information

## Two Pairs of Enantiomeric $\alpha$ -Pyrone Dimers from the Endophytic

### Fungus *Phoma* sp. YN02-P-3

Xia-Nan Sang,<sup>ab</sup> Shao-Fei Chen,<sup>ab</sup> Gang Chen,<sup>ab</sup> Xiao An,<sup>ab</sup> Sheng-Ge Li,<sup>ab</sup> Xiao-Jie Lu,<sup>ab</sup> Dan Zhao,<sup>ab</sup> Jiao Bai,<sup>ab</sup> Hai-Feng Wang\*<sup>ab</sup> and Yue-Hu Pei\*<sup>ab</sup>

<sup>a</sup> Laboratory of Structure-Based Drug Design & Discovery, Ministry of Education, Shenyang Pharmaceutical University, Shenyang 110016, China.

<sup>b</sup> School of Traditional Chinese Materia Medica, Shenyang Pharmaceutical University, Shenyang 110016, China.

## Contents

|                                                                                |    |
|--------------------------------------------------------------------------------|----|
| 1. General experimental procedures .....                                       | 4  |
| 2. Fungal material and fermentation .....                                      | 4  |
| 3. Extraction and isolation .....                                              | 5  |
| Physicochemical data .....                                                     | 5  |
| 4. Cytotoxic assay .....                                                       | 6  |
| 5. Computational details for ECD of compounds <b>1</b> and <b>2</b> .....      | 7  |
| 6. X-ray Crystallographic analyses of <b>1</b> .....                           | 23 |
| 7. The spectra of phomone A ( <b>1</b> ) .....                                 | 25 |
| <b>Figure S1.</b> The UV spectrum of compound <b>1</b> .....                   | 25 |
| <b>Figure S2.</b> The IR spectrum of compound <b>1</b> .....                   | 25 |
| <b>Figure S3.</b> The HR-ESI-MS spectrum of compound <b>1</b> .....            | 26 |
| <b>Figure S4.</b> The <sup>1</sup> H-NMR spectrum of compound <b>1</b> .....   | 27 |
| <b>Figure S5.</b> The <sup>13</sup> C-NMR spectrum of compound <b>1</b> .....  | 27 |
| <b>Figure S6.</b> The HSQC spectrum of compound <b>1</b> .....                 | 28 |
| <b>Figure S7.</b> The HMBC spectrum of compound <b>1</b> .....                 | 28 |
| <b>Figure S8.</b> The NOESY spectrum of compound <b>1</b> .....                | 29 |
| 8. The spectra of phomone B ( <b>2</b> ) .....                                 | 29 |
| <b>Figure S9.</b> The UV spectrum of compound <b>2</b> .....                   | 29 |
| <b>Figure S10.</b> The IR spectrum of compound <b>2</b> .....                  | 30 |
| <b>Figure S11.</b> The HR-ESI-MS spectrum of compound <b>2</b> .....           | 30 |
| <b>Figure S12.</b> The <sup>1</sup> H-NMR spectrum of compound <b>2</b> .....  | 31 |
| <b>Figure S13.</b> The <sup>13</sup> C-NMR spectrum of compound <b>2</b> ..... | 31 |
| <b>Figure S14.</b> The HSQC spectrum of compound <b>2</b> .....                | 32 |
| <b>Figure S15.</b> The HMBC spectrum of compound <b>2</b> .....                | 32 |
| <b>Figure S16.</b> The NOESY spectrum of compound <b>2</b> .....               | 33 |

|                                                                                                                               |    |
|-------------------------------------------------------------------------------------------------------------------------------|----|
| 8. The spectra of compound <b>4</b> .....                                                                                     | 33 |
| <b>Figure S17.</b> The <sup>1</sup> H-NMR spectrum of compound <b>4</b> .....                                                 | 33 |
| <b>Figure S18.</b> The <sup>13</sup> C NMR spectrum of compound <b>4</b> .....                                                | 34 |
| <b>Figure S19.</b> The ESI-MS spectrum of compound <b>4</b> .....                                                             | 34 |
| <b>Figure S20.</b> Experimental ECD spectra of <b>4a</b> and <b>4b</b> .....                                                  | 35 |
| 9. H <sub>2</sub> O-, pH- and temperature-dependent epimerization effect.....                                                 | 35 |
| <b>Figure S21.</b> Dynamic chiral HPLC spectra of <b>2</b> dissolved in H <sub>2</sub> O heating at 28 °C.....                | 35 |
| <b>Figure S22.</b> Dynamic chiral HPLC spectra of compound <b>2</b> dissolved in anhydrous ethanol at pH = 8.0, 7.0, 5.0..... | 36 |
| <b>Figure S23.</b> Dynamic chiral HPLC spectra of compound <b>1</b> dissolved in anhydrous ethanol at pH = 8.0, 7.0, 5.0..... | 36 |
| <b>Figure S24.</b> Chiral HPLC chromatogram of <b>2</b> dissolved in the H <sub>2</sub> O at pH = 8.0, 7.0, 5.0.....          | 37 |
| <b>Figure S25.</b> Dynamic chiral HPLC spectra: a) <b>2</b> dissolved in anhydrous ethanol heating at 50 °C.....              | 37 |

## 1. General experimental procedures

Optical rotation was measured with a JASCO P-2000 Series (Jasco Co., Ltd, Tokyo, Japan). The UV spectrum was recorded on a Shimadzu UV-2201 spectrophotometer (Shimadzu Corporation, Kyoto, Japan). The IR spectrum was obtained from a Bruker IFS-55 spectrophotometer using KBr pellet (Bruker Optik BmbH, Ettlingen, Germany). The HR-ESI-MS data were obtained on a microTOF-Q Bruker mass instrument (Bruker Daltonics, Billerica, MA, USA). CD spectra were recorded with a Biologic MOS-450 spectrometer using CDCl<sub>3</sub> as solvent. 1D and 2D NMR spectra were run on a Bruker AVANCE-400/-600 spectrometer (Bruker BioSpin GmbH, Rheinstetten, Germany). <sup>1</sup>H chemical shifts ( $\delta_{\text{H}}$ ) were measured in ppm, relative to TMS, and <sup>13</sup>C chemical shifts ( $\delta_{\text{C}}$ ) were measured relative to DMSO-*d*<sub>6</sub> and converted to TMS scale. Column chromatography (CC) was performed on Silica gel (200–300 mesh; Qingdao Marine Chemical Co., Qingdao, China) and Sephadex LH-20 (Pharmacia, Uppsala, Sweden) columns. Analytical and preparative thin-layer chromatographies (TLC) were carried out using silica gel plates (GF254 10-40  $\mu\text{m}$ , Qingdao Marine Chemical Co., China). Analytical TLC was used to follow the separation and check the purity of isolated compounds. Spots on the plates were observed under UV light and visualized by spraying 10% H<sub>2</sub>SO<sub>4</sub> in EtOH (v/v), followed by heating. HPLC was performed on a Shimadzu LC-10AVP liquid chromatograph with a YMC-pack C<sub>18</sub> (ODS) column (10  $\times$  250 mm, 5  $\mu\text{m}$ , Japan) and a Shimadzu LC-8AVP liquid chromatograph with a Diamonsil C<sub>18</sub> (ODS) column (4.6  $\times$  250 mm, 5  $\mu\text{m}$ , China). Reversed-phase HPLC (Shimadzu Corporation, Nakagyo-ku, Kyoto, Japan) was performed using a Shimadzu LC-8A HPLC pump equipped with SPD-10A detector, employing a YMC-Pack ODS-A column (250  $\times$  10 mm, 5 mm, YMC Co., Ltd. Japan). All reagents were HPLC or analytical grade and were purchased from Tianjin Damao Chemical Company (Tianjin, China).

## 2. Fungal material and fermentation

The fungal strain YN02-P-3 was isolated from the plant *Sumbaviopsis* J. J. Smith in Yunnan, P.R. China in September 2013. It was identified as *Phoma* sp. YN02-P-3 (GenBank accession no. KU522468) and has been deposited in the School of Traditional

Chinese Materia Medica, Shenyang Pharmaceutical University.

The fungal strain YN02-P-3 was cultured on slants of potato dextrose agar at 25 °C for 10 days. Agar plugs were inoculated in 500 mL Erlenmeyer flask containing 120 mL of media (0.4% glucose, 1% malt extract, and 0.4% yeast extract; the final pH of the media was adjusted to 6.5) before sterilization, and incubated at 25 °C on a rotary shaker at 170 rpm for one week. Large scale fermentation was carried out in one hundred and fifty 500 mL Fernbach flasks each containing 80 g of rice and 120 mL of distilled H<sub>2</sub>O. Each flask was inoculated with 5.0 mL of the culture medium and incubated at 25 °C for 40 days.

### 3. Extraction and isolation

The solid culture of *Phoma* sp. YN02-P-3 on cooked rice was extracted with 95% EtOH (1×150 mL) under ultrasonic 2 times, and 85% EtOH (1×150 mL), each time for twenty minutes, respectively. The combined extracts were concentrated in vacuo to yield a residue, which was suspended in H<sub>2</sub>O, successively partitioned with ethyl acetate and *n*-butanol. The EtOAc crude extracts (50.0 g) were applied on a silica gel column and eluted with Petroleum-Acetone gradient (from 100:0 to 0:100) to afford 9 fractions. Fr. 6 using silica gel column chromatography eluting with Petroleum-ethyl acetate (from 100:0 to 0:100) to give 3 subfractions. Fr.6-1 purified by semi-preparative HPLC on ODS column eluted with 32% MeOH-H<sub>2</sub>O to yield compound **1** (30 mg), **2** (80mg) and **3** (100 mg), Compounds **1** and **2** further subjected to chiral HPLC with cyclohexane-isopropanol (85:25) to yield **1a** (2.0 mg), **1b** (2.1 mg), **2a** (2.0 mg), **2b** (2.1 mg).

#### Physicochemical data

20

Phomone A (**1**): a colorless block crystals (MeOH);  $[\alpha]_D^{25}$  (c 0.20 MeOH) +30 (**1a**) and (c 0.20 MeOH) -39 (**1b**); UV (MeOH)  $\lambda_{\max}(\log\epsilon)$ : 212 (3.40), 255 (3.28), 301 (3.08), nm; IR (KBr)  $\nu_{\max}$ : 3438, 2957, 1711, 1631, 1383 cm<sup>-1</sup>; CD (MeOH)  $\lambda_{\max}(\Delta\epsilon)$  **1a**: 207 (+10.3), 244 (-67.9), 278 (+45.9) nm; **1b**: 208 (+1.6), 242 (+95.4), 277 (-34.9) nm; <sup>13</sup>C and <sup>1</sup>H NMR data, see Table 1; (+)-HRESIMS  $m/z$  563.1352 [M+Na]<sup>+</sup> (calcd for C<sub>24</sub>H<sub>28</sub>Na<sub>1</sub>O<sub>14</sub>, 563.1371);

Phomone B (**2**): a colorless block crystals (MeOH); UV (MeOH)  $\lambda_{\max}(\log\epsilon)$ : 209 (3.70), 254 (3.39), 298 (3.29) nm; IR (KBr)  $\nu_{\max}$ : 3424, 2920, 1718, 1695, 1623, 1383  $\text{cm}^{-1}$ ;  $^{13}\text{C}$  and  $^1\text{H}$  NMR data, see Table 1; CD (MeOH)  $\lambda_{\max}(\Delta\epsilon)$  **2a** : 212 (+18.7), 247 (-34.9), 279 (+38.4) nm; **2b** : 212 (-25.2), 246 (+45.1), 278 (-51.6) nm (+)-HRESIMS  $m/z$  563.1373  $[\text{M}+\text{Na}]^+$  (calcd for  $\text{C}_{24}\text{H}_{28}\text{Na}_1\text{O}_{14}$ , 563.1371);

#### 4. Cytotoxic assay

Cytotoxic activities of isolated compounds **1-3** and the positive control 5-fluorouracil were evaluated by the trypan blue method<sup>[1, 2]</sup> against the human leukaemia cell lines (HL-60) and the MTT assay<sup>[3]</sup> using the prostate cancer cell lines (PC-3) and the human colon cancer (HCT-116). The cell lines were purchased from America Type Culture Collection, ATCC (Rockville, MD, USA) and cultured in RPMI-1640 medium (Gibco, New York, NY, USA) supplemented with 100 U/mL penicillin, 100  $\mu\text{g}/\text{mL}$  streptomycin, 1 mM glutamine and 10% heat-inactivated foetal bovine serum (Gibco) at 37 °C in humidified atmosphere with 5%  $\text{CO}_2$ .

The human leukaemia cell lines (HL-60) (American Type Culture Collection, Rockville, MD, USA) were cultured in the above medium at a density of  $5 \times 10^4$  cells/mL at 37 under an atmosphere of 5%  $\text{CO}_2$ . Cell growth inhibition assay was performed as reported previously. The compounds were dissolved in DMSO, and the amount of DMSO was controlled lower than 0.1% in the final concentration. Cells were incubated with various drug concentrations for 3 days. The number of cells was determined by hemocytometer, and its viability was determined using trypan blue staining. The growth inhibitory ability of the compound was calculated and expressed using the  $\text{IC}_{50}$  value (half-inhibitory concentration). 5-Fluorouracil (5-FU) and 0.1% DMSO were used as a positive control and a negative control, respectively.

In the MTT assay, briefly, cells suspensions, 200  $\mu\text{l}$ , at a density of  $2.5 \times 10^4$  cells/mL, were plated in 96-well microtiter plates and incubated for 24 h at 37 °C under 5%  $\text{CO}_2$  and 95% air. Then the test compounds with different concentrations in DMSO were placed into each microtiter plates and further incubated for 72 h. Finally, 50  $\mu\text{l}$  of a 0.4% MTT solution was added to each well and incubated for 4 h. Then, the MTT was

removed from the wells and the fromazan crystals were dissolved in DMSO (200  $\mu$ l) for 10 min with shaking. Then the plate was read immediately on a microtiter plate reader (Bio-RAD) at a wavelength of 570 nm to record the optical density (OD). The IC<sub>50</sub> value was defined as the concentration of the control in the MTT assay. 5-Fluorouracil (5-Fu) was used as a positive control.

### References:

- [1] F. Wang, H. M. Hua, Y. H. Pei, D. Chen, and Y. K. Jing, *J. Nat. Prod.*, 2006, **69**, 807-810.
- [2] J. Hu, X. D. Shi, J. G. Chen, X. Mao, L. Zhu, L. YU, and J. Y. Shi, *Food Chem.*, 2014, **148**, 437–444.
- [3] K. B. Wang, Y. T. Di, Y. Bao, C.M. Yuan, G. Chen, D. H. Li, J. Bai, H. P. He, X. J. Hao, Y. H. Pei, Y. K. Jing, Z. L. Li, and H. M. Hua, *Org. Lett.*, 2014, **16**, 4028–4031.

## 5. Computational details for ECD of compounds **1** and **2**

### Computational methods

The Spartan 14.0 (Wavefunction Inc., Irvine, CA, USA) searches using molecular mechanics MMFF were performed for **1** and **2**, which gave 100 conformers and 100 respectively. The low-energy conformers of **1** and **2** separately accounting for more than 6% and 5% Boltzmann distribution was further optimized successively in the gas phase by semi-empirical method and the Hartree-Fork (HF) method at the 6-31G (d) level in Gaussian 09 program package,<sup>[1]</sup> which was reoptimized and analysed frequency, orderly, using the density functional theory (DFT) at the B3LYP/6-31G (d, p) level and the same way in the methanol, resulted in no imaginary frequencies. Solvent effects were taken into consideration by using the conductor polarizable continuum model (CPCM). The conformers of **1** and **2** were calculated electronic circular dichroism (ECD) by the time-dependent density functional theory (TD-DFT) method at the B3LYP/6-31G (d, p) level with the CPCM model in methanol solution. The overall calculated ECD curves of the **1** and **2** were generated severally by Boltzmann weighting of their selected low-energy conformers using SpecDis 1.51<sup>[2-3]</sup> with  $\sigma = 0.29\text{eV}$  at -6nm shift, together with  $\sigma = 0.30\text{eV}$  at 30nm shift.

**Table S1** Energy analysis of compound the **1a**.

| Label       | MMFF            |                 |
|-------------|-----------------|-----------------|
|             | rel. E(Kal/mol) | Boltzmann Dist. |
| <b>1a-1</b> | 0.00            | 0.194           |
| <b>1a-2</b> | 0.88            | 0.136           |
| <b>1a-3</b> | 1.02            | 0.128           |
| <b>1a-4</b> | 1.36            | 0.112           |
| <b>2a-5</b> | 2.05            | 0.085           |

**Table S2** Energy analysis of compound the **2b**

| Label       | MMFF            |                 |
|-------------|-----------------|-----------------|
|             | rel. E(Kal/mol) | Boltzmann Dist. |
| <b>2b-1</b> | 0.00            | 0.825           |
| <b>2b-2</b> | 5.03            | 0.109           |

**Table S3** Computational methods for ECD of **1a****1a-1**

Standard orientation:

| Center Number | Atomic Number | Atomic Type | Coordinates (Angstroms) |           |           |
|---------------|---------------|-------------|-------------------------|-----------|-----------|
|               |               |             | X                       | Y         | Z         |
| 1             | 8             | 0           | 2.069413                | -0.947795 | -0.878500 |
| 2             | 8             | 0           | -1.951195               | -2.095934 | 2.051661  |
| 3             | 8             | 0           | -4.047562               | 2.089612  | 0.800105  |
| 4             | 8             | 0           | -2.691812               | 0.390507  | 0.413952  |
| 5             | 8             | 0           | -0.982162               | -1.143056 | -2.330690 |
| 6             | 8             | 0           | 5.214935                | 0.057174  | 1.535122  |
| 7             | 8             | 0           | -4.521014               | -3.007006 | 0.278562  |
| 8             | 8             | 0           | 3.358755                | -2.195077 | -2.201227 |
| 9             | 8             | 0           | -0.032718               | 3.126270  | -1.342608 |
| 10            | 8             | 0           | -1.564360               | 4.896410  | 0.392567  |
| 11            | 8             | 0           | 1.486864                | 1.389473  | 2.769147  |
| 12            | 8             | 0           | -4.949497               | -1.347456 | -1.190499 |
| 13            | 6             | 0           | -3.006218               | 1.727231  | 0.285180  |
| 14            | 6             | 0           | 0.407402                | 0.243799  | 0.306301  |
| 15            | 6             | 0           | -2.165791               | -0.979580 | -1.551249 |
| 16            | 6             | 0           | -2.067701               | 2.618315  | -0.398070 |
| 17            | 6             | 0           | -4.162118               | -2.281470 | -0.626472 |



|    |   |   |           |           |           |
|----|---|---|-----------|-----------|-----------|
| 18 | 8 | 0 | -0.380555 | -0.766324 | 2.971413  |
| 19 | 6 | 0 | -0.876301 | 2.177411  | -0.885655 |
| 20 | 6 | 0 | 4.186058  | -0.292060 | 0.702788  |
| 21 | 6 | 0 | 1.853860  | -0.109691 | 0.181274  |
| 22 | 6 | 0 | 2.874012  | 0.240409  | 1.016408  |
| 23 | 6 | 0 | 2.779307  | 1.093961  | 2.281824  |
| 24 | 6 | 0 | -0.314578 | 0.122709  | -2.322880 |
| 25 | 6 | 0 | -1.647472 | -0.197998 | -0.337104 |
| 26 | 6 | 0 | -0.511620 | 0.724905  | -0.895826 |
| 27 | 6 | 0 | 4.400127  | -1.160134 | -0.332435 |
| 28 | 6 | 0 | 1.236110  | 2.803637  | -1.941878 |
| 29 | 6 | 0 | -0.592093 | -0.914129 | 0.556211  |
| 30 | 6 | 0 | -0.944624 | -1.227296 | 1.991358  |
| 31 | 6 | 0 | -2.799050 | -2.343809 | -1.293556 |
| 32 | 6 | 0 | -2.406007 | 4.095924  | -0.439972 |
| 33 | 6 | 0 | 3.300459  | -1.493082 | -1.200120 |
| 34 | 6 | 0 | -2.413766 | -2.480379 | 3.366869  |
| 35 | 6 | 0 | -6.267506 | -1.203187 | -0.621808 |
| 36 | 6 | 0 | 6.038693  | 1.149391  | 1.071190  |
| 37 | 8 | 0 | 6.165920  | -1.513537 | -1.981167 |
| 38 | 6 | 0 | 5.721625  | -1.816456 | -0.661706 |
| 39 | 1 | 0 | -0.675225 | 4.831346  | 0.015610  |
| 40 | 1 | 0 | 1.024130  | 0.559763  | 2.993162  |
| 41 | 1 | 0 | 0.316225  | 0.983933  | 1.097982  |
| 42 | 1 | 0 | -2.885417 | -0.335681 | -2.077414 |
| 43 | 1 | 0 | 3.259369  | 2.060979  | 2.093416  |
| 44 | 1 | 0 | 3.386379  | 0.593786  | 3.047019  |
| 45 | 1 | 0 | 0.722568  | -0.050474 | -2.598573 |
| 46 | 1 | 0 | -0.782546 | 0.792168  | -3.057197 |
| 47 | 1 | 0 | 1.756996  | 3.755283  | -2.035462 |
| 48 | 1 | 0 | 1.820029  | 2.135511  | -1.306326 |
| 49 | 1 | 0 | 1.098393  | 2.369612  | -2.934483 |
| 50 | 1 | 0 | -0.265845 | -1.833535 | 0.061915  |
| 51 | 1 | 0 | -2.926448 | -2.839388 | -2.263177 |
| 52 | 1 | 0 | -2.157252 | -2.976402 | -0.678875 |
| 53 | 1 | 0 | -3.424022 | 4.232739  | -0.075088 |
| 54 | 1 | 0 | -2.364233 | 4.445460  | -1.480482 |
| 55 | 1 | 0 | -3.266743 | -3.131196 | 3.187430  |
| 56 | 1 | 0 | -1.624782 | -3.012193 | 3.901754  |
| 57 | 1 | 0 | -2.712524 | -1.596836 | 3.933223  |
| 58 | 1 | 0 | -6.767987 | -0.452325 | -1.230909 |
| 59 | 1 | 0 | -6.194939 | -0.866389 | 0.414458  |
| 60 | 1 | 0 | -6.806771 | -2.151311 | -0.660966 |
| 61 | 1 | 0 | 6.474967  | 0.919259  | 0.094739  |
| 62 | 1 | 0 | 5.458238  | 2.074773  | 1.002473  |
| 63 | 1 | 0 | 6.828016  | 1.265084  | 1.813384  |

|    |   |   |          |           |           |
|----|---|---|----------|-----------|-----------|
| 64 | 1 | 0 | 5.468252 | -1.851517 | -2.566133 |
| 65 | 1 | 0 | 6.493242 | -1.476206 | 0.029126  |
| 66 | 1 | 0 | 5.610994 | -2.902855 | -0.527342 |

**1a-2**

Standard orientation:

| Center<br>Number | Atomic<br>Number | Atomic<br>Type | Coordinates (Angstroms) |           |           |
|------------------|------------------|----------------|-------------------------|-----------|-----------|
|                  |                  |                | X                       | Y         | Z         |
| 1                | 8                | 0              | 1.925577                | -1.127172 | 0.505544  |
| 2                | 8                | 0              | -2.310779               | -1.652202 | 2.410270  |
| 3                | 8                | 0              | -4.739756               | 0.765829  | -0.167560 |
| 4                | 8                | 0              | -2.844824               | -0.343847 | -0.372573 |
| 5                | 8                | 0              | 0.226075                | -0.524615 | -2.091850 |
| 6                | 8                | 0              | 4.928057                | 1.584192  | -0.016131 |
| 7                | 8                | 0              | -1.815452               | -4.160010 | 0.029220  |
| 8                | 8                | 0              | 3.267299                | -2.888801 | 0.304917  |
| 9                | 8                | 0              | -0.697399               | 3.278318  | -0.404694 |
| 10               | 8                | 0              | -4.588818               | 3.684221  | -0.651075 |
| 11               | 8                | 0              | 2.723792                | 3.214005  | -0.873010 |
| 12               | 8                | 0              | -2.862037               | -3.392320 | -1.819984 |
| 13               | 6                | 0              | -3.519790               | 0.829411  | -0.179958 |
| 14               | 6                | 0              | 0.223521                | 0.527814  | 0.746386  |
| 15               | 6                | 0              | -0.960060               | -1.179107 | -1.637124 |
| 16               | 6                | 0              | -2.803886               | 2.107194  | -0.022434 |
| 17               | 6                | 0              | -1.813559               | -3.489135 | -0.983561 |
| 18               | 8                | 0              | -1.745172               | 0.490682  | 2.846045  |
| 19               | 6                | 0              | -1.473658               | 2.188892  | -0.296899 |
| 20               | 6                | 0              | 4.021231                | 0.591758  | 0.104065  |
| 21               | 6                | 0              | 1.678648                | 0.208560  | 0.518697  |
| 22               | 6                | 0              | 2.687456                | 1.104075  | 0.358782  |
| 23               | 6                | 0              | 2.489488                | 2.603935  | 0.397965  |
| 24               | 6                | 0              | 0.040525                | 0.877598  | -1.888907 |
| 25               | 6                | 0              | -1.423545               | -0.371924 | -0.387368 |
| 26               | 6                | 0              | -0.647920               | 0.961247  | -0.521488 |
| 27               | 6                | 0              | 4.258379                | -0.758393 | -0.031508 |
| 28               | 6                | 0              | -1.219906               | 4.593023  | -0.687992 |
| 29               | 6                | 0              | -0.725271               | -0.680738 | 0.975234  |
| 30               | 6                | 0              | -1.630927               | -0.522191 | 2.182987  |
| 31               | 6                | 0              | -0.639070               | -2.664786 | -1.472920 |
| 32               | 6                | 0              | -3.733257               | 3.230977  | 0.396749  |
| 33               | 6                | 0              | 3.181126                | -1.668322 | 0.259871  |
| 34               | 6                | 0              | -3.251328               | -1.618779 | 3.506792  |
| 35               | 6                | 0              | -4.047131               | -4.121055 | -1.436028 |

|    |   |   |           |           |           |
|----|---|---|-----------|-----------|-----------|
| 36 | 6 | 0 | 6.318546  | 1.402481  | 0.320933  |
| 37 | 8 | 0 | 6.182090  | -2.148943 | 0.593506  |
| 38 | 6 | 0 | 5.525788  | -1.460330 | -0.471004 |
| 39 | 1 | 0 | -5.133652 | 2.915462  | -0.880773 |
| 40 | 1 | 0 | 3.668399  | 3.100420  | -1.055577 |
| 41 | 1 | 0 | 0.125718  | 1.257531  | 1.551934  |
| 42 | 1 | 0 | -1.766496 | -1.057750 | -2.373964 |
| 43 | 1 | 0 | 3.150789  | 3.032427  | 1.161615  |
| 44 | 1 | 0 | 1.463111  | 2.851684  | 0.662357  |
| 45 | 1 | 0 | 1.014472  | 1.367844  | -1.924645 |
| 46 | 1 | 0 | -0.610672 | 1.304242  | -2.665006 |
| 47 | 1 | 0 | -2.136370 | 4.525195  | -1.276918 |
| 48 | 1 | 0 | -1.398515 | 5.140766  | 0.239508  |
| 49 | 1 | 0 | -0.438013 | 5.094170  | -1.258710 |
| 50 | 1 | 0 | -0.256234 | -1.661593 | 1.023990  |
| 51 | 1 | 0 | -0.336306 | -3.043212 | -2.455068 |
| 52 | 1 | 0 | 0.196288  | -2.809270 | -0.786978 |
| 53 | 1 | 0 | -3.179346 | 4.096929  | 0.751028  |
| 54 | 1 | 0 | -4.325849 | 2.862637  | 1.243485  |
| 55 | 1 | 0 | -3.698001 | -2.610843 | 3.536087  |
| 56 | 1 | 0 | -2.733599 | -1.402632 | 4.443153  |
| 57 | 1 | 0 | -4.014463 | -0.859070 | 3.327012  |
| 58 | 1 | 0 | -4.772331 | -3.936929 | -2.226805 |
| 59 | 1 | 0 | -4.423509 | -3.754234 | -0.478945 |
| 60 | 1 | 0 | -3.828886 | -5.187707 | -1.356642 |
| 61 | 1 | 0 | 6.443235  | 0.571080  | 1.016780  |
| 62 | 1 | 0 | 6.909487  | 1.236593  | -0.582092 |
| 63 | 1 | 0 | 6.631891  | 2.335223  | 0.791230  |
| 64 | 1 | 0 | 5.550432  | -2.823782 | 0.887433  |
| 65 | 1 | 0 | 5.247652  | -2.164433 | -1.266214 |
| 66 | 1 | 0 | 6.249147  | -0.768652 | -0.895884 |

### 1a-3

Standard orientation:

| Center<br>Number | Atomic<br>Number | Atomic<br>Type | Coordinates (Angstroms) |           |           |
|------------------|------------------|----------------|-------------------------|-----------|-----------|
|                  |                  |                | X                       | Y         | Z         |
| 1                | 8                | 0              | -1.805429               | 0.802908  | 0.622854  |
| 2                | 8                | 0              | 2.068822                | 0.985620  | 3.333663  |
| 3                | 8                | 0              | 4.972623                | -0.898680 | 0.094017  |
| 4                | 8                | 0              | 3.123571                | 0.227740  | 0.511832  |
| 5                | 8                | 0              | 1.311654                | 1.411485  | -1.964894 |
| 6                | 8                | 0              | -4.766802               | -2.012836 | 0.294829  |
| 7                | 8                | 0              | 2.125095                | 4.568004  | -1.567303 |

|    |   |   |           |           |           |
|----|---|---|-----------|-----------|-----------|
| 8  | 8 | 0 | -3.272671 | 2.474350  | 0.688802  |
| 9  | 8 | 0 | 0.863440  | -2.608766 | -1.558293 |
| 10 | 8 | 0 | 4.522018  | -3.682250 | -0.844252 |
| 11 | 8 | 0 | -1.889856 | -3.420833 | -0.968456 |
| 12 | 8 | 0 | -0.034639 | 4.987484  | -1.057528 |
| 13 | 6 | 0 | 3.780859  | -0.772117 | -0.141973 |
| 14 | 6 | 0 | 0.024227  | -0.698850 | 0.685975  |
| 15 | 6 | 0 | 1.754561  | 1.857617  | -0.675623 |
| 16 | 6 | 0 | 3.058023  | -1.705175 | -1.021108 |
| 17 | 6 | 0 | 1.089602  | 4.254836  | -1.012764 |
| 18 | 8 | 0 | 1.605661  | -1.210930 | 3.064120  |
| 19 | 6 | 0 | 1.700033  | -1.672672 | -1.068535 |
| 20 | 6 | 0 | -3.795730 | -1.047604 | 0.362701  |
| 21 | 6 | 0 | -1.460924 | -0.512083 | 0.577369  |
| 22 | 6 | 0 | -2.411069 | -1.478922 | 0.439552  |
| 23 | 6 | 0 | -2.064232 | -2.950058 | 0.371753  |
| 24 | 6 | 0 | 0.376414  | 0.352321  | -1.784162 |
| 25 | 6 | 0 | 1.773828  | 0.566429  | 0.190129  |
| 26 | 6 | 0 | 0.935983  | -0.476572 | -0.593046 |
| 27 | 6 | 0 | -4.155201 | 0.272041  | 0.446895  |
| 28 | 6 | 0 | 1.253841  | -4.002922 | -1.668646 |
| 29 | 6 | 0 | 0.828694  | 0.406116  | 1.427282  |
| 30 | 6 | 0 | 1.529690  | -0.057518 | 2.690960  |
| 31 | 6 | 0 | 0.902995  | 3.016802  | -0.154319 |
| 32 | 6 | 0 | 3.985402  | -2.685940 | -1.712492 |
| 33 | 6 | 0 | -3.121380 | 1.269584  | 0.596402  |
| 34 | 6 | 0 | 2.819964  | 0.676047  | 4.528951  |
| 35 | 6 | 0 | 0.046137  | 6.223491  | -1.799153 |
| 36 | 6 | 0 | -4.996513 | -2.581042 | -1.024422 |
| 37 | 8 | 0 | -6.556660 | 0.007067  | -0.145299 |
| 38 | 6 | 0 | -5.571568 | 0.819314  | 0.467643  |
| 39 | 1 | 0 | 5.042852  | -3.193255 | -0.188432 |
| 40 | 1 | 0 | -1.165254 | -2.907949 | -1.360561 |
| 41 | 1 | 0 | 0.242872  | -1.669277 | 1.131599  |
| 42 | 1 | 0 | 2.778947  | 2.214325  | -0.801356 |
| 43 | 1 | 0 | -2.887737 | -3.530240 | 0.790394  |
| 44 | 1 | 0 | -1.175104 | -3.160028 | 0.975746  |
| 45 | 1 | 0 | -0.625777 | 0.736138  | -1.563340 |
| 46 | 1 | 0 | 0.330171  | -0.217129 | -2.713755 |
| 47 | 1 | 0 | 0.350037  | -4.566736 | -1.440396 |
| 48 | 1 | 0 | 1.576402  | -4.217532 | -2.688600 |
| 49 | 1 | 0 | 2.045087  | -4.235646 | -0.955089 |
| 50 | 1 | 0 | 0.257416  | 1.304940  | 1.650040  |
| 51 | 1 | 0 | -0.158985 | 2.768899  | -0.094119 |
| 52 | 1 | 0 | 1.232698  | 3.281786  | 0.858703  |
| 53 | 1 | 0 | 4.792970  | -2.097172 | -2.165033 |

|    |   |   |           |           |           |
|----|---|---|-----------|-----------|-----------|
| 54 | 1 | 0 | 3.479251  | -3.207533 | -2.522112 |
| 55 | 1 | 0 | 3.173368  | 1.633699  | 4.906562  |
| 56 | 1 | 0 | 2.177524  | 0.186806  | 5.263374  |
| 57 | 1 | 0 | 3.661771  | 0.024300  | 4.287160  |
| 58 | 1 | 0 | -0.940093 | 6.677346  | -1.718251 |
| 59 | 1 | 0 | 0.291254  | 6.024047  | -2.844240 |
| 60 | 1 | 0 | 0.805724  | 6.878116  | -1.367106 |
| 61 | 1 | 0 | -5.449152 | -1.820753 | -1.666269 |
| 62 | 1 | 0 | -4.062756 | -2.948487 | -1.453128 |
| 63 | 1 | 0 | -5.693668 | -3.404804 | -0.870434 |
| 64 | 1 | 0 | -6.508378 | -0.857595 | 0.287162  |
| 65 | 1 | 0 | -5.836376 | 1.045946  | 1.513793  |
| 66 | 1 | 0 | -5.571476 | 1.776162  | -0.061263 |

#### 1a-4

Standard orientation:

| Center<br>Number | Atomic<br>Number | Atomic<br>Type | Coordinates (Angstroms) |           |           |
|------------------|------------------|----------------|-------------------------|-----------|-----------|
|                  |                  |                | X                       | Y         | Z         |
| 1                | 8                | 0              | 2.045588                | -1.022479 | -0.784982 |
| 2                | 8                | 0              | -1.655269               | -2.413357 | 2.061920  |
| 3                | 8                | 0              | -4.054908               | 1.875928  | 1.142804  |
| 4                | 8                | 0              | -2.693344               | 0.242697  | 0.554510  |
| 5                | 8                | 0              | -0.962800               | -1.023493 | -2.308062 |
| 6                | 8                | 0              | 5.300905                | 0.853237  | 0.848639  |
| 7                | 8                | 0              | -4.365291               | -3.146513 | 0.267974  |
| 8                | 8                | 0              | 3.320082                | -2.380853 | -2.014602 |
| 9                | 8                | 0              | -0.240151               | 3.182745  | -1.228448 |
| 10               | 8                | 0              | -3.946103               | 4.182949  | -0.438958 |
| 11               | 8                | 0              | 3.285429                | 2.907145  | 1.326058  |
| 12               | 8                | 0              | -4.910062               | -1.489335 | -1.165353 |
| 13               | 6                | 0              | -3.022823               | 1.572252  | 0.560183  |
| 14               | 6                | 0              | 0.419393                | 0.229130  | 0.390572  |
| 15               | 6                | 0              | -2.136975               | -0.960815 | -1.502279 |
| 16               | 6                | 0              | -2.146890               | 2.553537  | -0.074468 |
| 17               | 6                | 0              | -4.064010               | -2.389608 | -0.632198 |
| 18               | 8                | 0              | -0.562739               | -0.664695 | 2.994660  |
| 19               | 6                | 0              | -0.972337               | 2.204531  | -0.668109 |
| 20               | 6                | 0              | 4.252510                | 0.174526  | 0.286933  |
| 21               | 6                | 0              | 1.867360                | -0.037855 | 0.142214  |
| 22               | 6                | 0              | 2.934918                | 0.561621  | 0.739253  |
| 23               | 6                | 0              | 2.847730                | 1.636468  | 1.803928  |
| 24               | 6                | 0              | -0.328376               | 0.255978  | -2.213067 |
| 25               | 6                | 0              | -1.629188               | -0.243815 | -0.245961 |

|    |   |   |           |           |           |
|----|---|---|-----------|-----------|-----------|
| 26 | 6 | 0 | -0.549159 | 0.764735  | -0.753711 |
| 27 | 6 | 0 | 4.443192  | -0.756284 | -0.696741 |
| 28 | 6 | 0 | 1.168468  | 3.036655  | -1.494171 |
| 29 | 6 | 0 | -0.535104 | -0.973645 | 0.591971  |
| 30 | 6 | 0 | -0.895578 | -1.311938 | 2.022222  |
| 31 | 6 | 0 | -2.711255 | -2.363513 | -1.322856 |
| 32 | 6 | 0 | -2.619035 | 3.993234  | 0.041387  |
| 33 | 6 | 0 | 3.294828  | -1.452644 | -1.221216 |
| 34 | 6 | 0 | -2.143395 | -2.812372 | 3.361406  |
| 35 | 6 | 0 | -6.222022 | -1.422969 | -0.568557 |
| 36 | 6 | 0 | 6.118280  | 0.102984  | 1.779790  |
| 37 | 8 | 0 | 6.131347  | -2.494885 | -1.002029 |
| 38 | 6 | 0 | 5.771986  | -1.147147 | -1.299229 |
| 39 | 1 | 0 | -4.494773 | 3.608271  | 0.119145  |
| 40 | 1 | 0 | 4.230711  | 2.810143  | 1.132550  |
| 41 | 1 | 0 | 0.315933  | 0.889039  | 1.250218  |
| 42 | 1 | 0 | -2.891973 | -0.313666 | -1.971908 |
| 43 | 1 | 0 | 3.439538  | 1.324850  | 2.673643  |
| 44 | 1 | 0 | 1.823386  | 1.773152  | 2.148298  |
| 45 | 1 | 0 | 0.715889  | 0.118317  | -2.487518 |
| 46 | 1 | 0 | -0.794574 | 0.962903  | -2.911673 |
| 47 | 1 | 0 | 1.385569  | 2.140322  | -2.077175 |
| 48 | 1 | 0 | 1.435283  | 3.912274  | -2.084946 |
| 49 | 1 | 0 | 1.741241  | 3.034398  | -0.563419 |
| 50 | 1 | 0 | -0.191808 | -1.866570 | 0.066857  |
| 51 | 1 | 0 | -2.834613 | -2.803068 | -2.319306 |
| 52 | 1 | 0 | -2.035941 | -3.003944 | -0.754063 |
| 53 | 1 | 0 | -1.969851 | 4.638541  | -0.550089 |
| 54 | 1 | 0 | -2.537115 | 4.309468  | 1.092469  |
| 55 | 1 | 0 | -2.797320 | -3.661964 | 3.175565  |
| 56 | 1 | 0 | -1.310233 | -3.100643 | 4.005461  |
| 57 | 1 | 0 | -2.697815 | -1.994057 | 3.824378  |
| 58 | 1 | 0 | -6.770422 | -0.683783 | -1.150014 |
| 59 | 1 | 0 | -6.145167 | -1.107190 | 0.474009  |
| 60 | 1 | 0 | -6.715244 | -2.395272 | -0.620545 |
| 61 | 1 | 0 | 6.977214  | 0.735562  | 2.000481  |
| 62 | 1 | 0 | 5.557476  | -0.098474 | 2.697313  |
| 63 | 1 | 0 | 6.448692  | -0.839661 | 1.337843  |
| 64 | 1 | 0 | 5.437408  | -3.040823 | -1.404283 |
| 65 | 1 | 0 | 5.714996  | -0.991242 | -2.385647 |
| 66 | 1 | 0 | 6.566931  | -0.507872 | -0.914478 |

---

**1a-5**

Standard orientation:

---

| Center<br>Number | Atomic<br>Number | Atomic<br>Type | Coordinates (Angstroms) |           |           |
|------------------|------------------|----------------|-------------------------|-----------|-----------|
|                  |                  |                | X                       | Y         | Z         |
| 1                | 8                | 0              | -1.841279               | 0.520018  | -1.025630 |
| 2                | 8                | 0              | 1.846021                | 1.607237  | 2.376590  |
| 3                | 8                | 0              | 4.773956                | -1.369040 | 0.537630  |
| 4                | 8                | 0              | 3.040279                | -0.039204 | 0.236435  |
| 5                | 8                | 0              | 1.880662                | 0.480245  | -2.761978 |
| 6                | 8                | 0              | -4.955657               | -1.262849 | 0.958162  |
| 7                | 8                | 0              | 0.809729                | 4.027958  | 0.205369  |
| 8                | 8                | 0              | -3.227479               | 1.787632  | -2.221937 |
| 9                | 8                | 0              | 0.968843                | -3.322274 | -1.316969 |
| 10               | 8                | 0              | 2.954581                | -4.640996 | 0.381866  |
| 11               | 8                | 0              | -2.053935               | -1.614726 | 2.922261  |
| 12               | 8                | 0              | 2.949571                | 3.854642  | -0.497841 |
| 13               | 6                | 0              | 3.648962                | -1.264079 | 0.085575  |
| 14               | 6                | 0              | -0.109546               | -0.635187 | 0.110375  |
| 15               | 6                | 0              | 2.132539                | 1.269464  | -1.599074 |
| 16               | 6                | 0              | 2.908068                | -2.359412 | -0.539732 |
| 17               | 6                | 0              | 1.639691                | 3.563247  | -0.552658 |
| 18               | 8                | 0              | 0.488594                | -0.116880 | 2.886322  |
| 19               | 6                | 0              | 1.635952                | -2.195125 | -0.983666 |
| 20               | 6                | 0              | -3.929719               | -0.652039 | 0.300315  |
| 21               | 6                | 0              | -1.574668               | -0.454674 | -0.113246 |
| 22               | 6                | 0              | -2.570911               | -1.075842 | 0.578511  |
| 23               | 6                | 0              | -2.295234               | -2.144732 | 1.622508  |
| 24               | 6                | 0              | 0.752392                | -0.351117 | -2.498116 |
| 25               | 6                | 0              | 1.823783                | 0.298915  | -0.418071 |
| 26               | 6                | 0              | 0.968296                | -0.855336 | -1.038894 |
| 27               | 6                | 0              | -4.212237               | 0.285916  | -0.658325 |
| 28               | 6                | 0              | -0.247855               | -3.325089 | -2.085935 |
| 29               | 6                | 0              | 0.671250                | 0.619638  | 0.586796  |
| 30               | 6                | 0              | 0.986391                | 0.640984  | 2.068350  |
| 31               | 6                | 0              | 1.338449                | 2.588918  | -1.674102 |
| 32               | 6                | 0              | 3.549912                | -3.732463 | -0.547327 |
| 33               | 6                | 0              | -3.130238               | 0.916996  | -1.368037 |
| 34               | 6                | 0              | 2.202933                | 1.729396  | 3.775635  |
| 35               | 6                | 0              | 3.354381                | 4.760024  | 0.552017  |
| 36               | 6                | 0              | -5.197872               | -0.789171 | 2.306845  |
| 37               | 8                | 0              | -5.768401               | 2.140229  | -1.006050 |
| 38               | 6                | 0              | -5.608951               | 0.726432  | -1.041930 |
| 39               | 1                | 0              | 2.047285                | -4.780750 | 0.074819  |
| 40               | 1                | 0              | -1.228348               | -1.097314 | 2.894974  |
| 41               | 1                | 0              | 0.029561                | -1.424291 | 0.846845  |
| 42               | 1                | 0              | 3.198939                | 1.501894  | -1.584179 |
| 43               | 1                | 0              | -1.470859               | -2.789579 | 1.295655  |

|    |   |   |           |           |           |
|----|---|---|-----------|-----------|-----------|
| 44 | 1 | 0 | -3.179493 | -2.778353 | 1.706824  |
| 45 | 1 | 0 | -0.188326 | 0.196970  | -2.596970 |
| 46 | 1 | 0 | 0.770183  | -1.148476 | -3.240411 |
| 47 | 1 | 0 | -0.712779 | -4.289760 | -1.887451 |
| 48 | 1 | 0 | -0.930451 | -2.530417 | -1.781964 |
| 49 | 1 | 0 | -0.021975 | -3.242510 | -3.151917 |
| 50 | 1 | 0 | 0.166018  | 1.557973  | 0.349346  |
| 51 | 1 | 0 | 1.621482  | 3.061952  | -2.619920 |
| 52 | 1 | 0 | 0.260065  | 2.420766  | -1.696780 |
| 53 | 1 | 0 | 4.595621  | -3.632141 | -0.256411 |
| 54 | 1 | 0 | 3.513045  | -4.141733 | -1.565661 |
| 55 | 1 | 0 | 2.908967  | 2.555678  | 3.822125  |
| 56 | 1 | 0 | 1.314550  | 1.945682  | 4.371023  |
| 57 | 1 | 0 | 2.666443  | 0.805604  | 4.125161  |
| 58 | 1 | 0 | 4.433819  | 4.858470  | 0.452190  |
| 59 | 1 | 0 | 3.093965  | 4.344640  | 1.527105  |
| 60 | 1 | 0 | 2.867727  | 5.729062  | 0.426014  |
| 61 | 1 | 0 | -5.565304 | 0.241571  | 2.278745  |
| 62 | 1 | 0 | -5.966071 | -1.444339 | 2.716980  |
| 63 | 1 | 0 | -4.287793 | -0.846635 | 2.908761  |
| 64 | 1 | 0 | -5.105411 | 2.487267  | -1.625624 |
| 65 | 1 | 0 | -5.838611 | 0.331468  | -2.043844 |
| 66 | 1 | 0 | -6.330728 | 0.297384  | -0.346180 |

**Table S4** Computational methods for ECD of **2b**.

**2b-1**

Standard orientation:

| Center<br>Number | Atomic<br>Number | Atomic<br>Type | Coordinates (Angstroms) |           |           |
|------------------|------------------|----------------|-------------------------|-----------|-----------|
|                  |                  |                | X                       | Y         | Z         |
| 1                | 6                | 0              | -1.974341               | 0.607501  | 0.306850  |
| 2                | 6                | 0              | -1.048597               | -2.054857 | 0.793693  |
| 3                | 8                | 0              | -2.710422               | -0.277637 | 1.138597  |
| 4                | 6                | 0              | -0.932065               | -0.016184 | -0.711012 |
| 5                | 6                | 0              | -0.563345               | -1.427892 | -0.311840 |
| 6                | 6                | 0              | -2.211189               | -1.494378 | 1.501288  |
| 7                | 8                | 0              | -2.807826               | -2.088456 | 2.382732  |
| 8                | 6                | 0              | -0.501328               | -3.339716 | 1.407082  |
| 9                | 8                | 0              | 0.916348                | -3.432479 | 1.413122  |
| 10               | 8                | 0              | 0.332132                | -1.933115 | -1.192487 |
| 11               | 6                | 0              | 0.392147                | -3.351644 | -1.486696 |
| 12               | 6                | 0              | -1.215463               | 0.091448  | -2.225379 |



|    |   |   |           |           |           |
|----|---|---|-----------|-----------|-----------|
| 13 | 8 | 0 | -0.010907 | 0.087302  | -2.992635 |
| 14 | 6 | 0 | -0.774647 | 1.306793  | 1.045702  |
| 15 | 6 | 0 | 0.096132  | 1.088307  | -0.208349 |
| 16 | 6 | 0 | 1.539581  | 0.760267  | -0.027422 |
| 17 | 6 | 0 | 4.091826  | -0.158020 | 0.630689  |
| 18 | 8 | 0 | 1.712817  | -0.166772 | 0.951097  |
| 19 | 6 | 0 | 2.598412  | 1.272960  | -0.715520 |
| 20 | 6 | 0 | 3.910347  | 0.763514  | -0.372873 |
| 21 | 6 | 0 | 2.941866  | -0.671495 | 1.316874  |
| 22 | 8 | 0 | 2.936305  | -1.540559 | 2.190420  |
| 23 | 6 | 0 | 5.437045  | -0.699230 | 1.065875  |
| 24 | 8 | 0 | 5.481875  | -2.122078 | 1.066414  |
| 25 | 8 | 0 | 5.004298  | 1.268145  | -1.006955 |
| 26 | 6 | 0 | 5.225164  | 0.793993  | -2.359571 |
| 27 | 6 | 0 | 2.428461  | 2.353993  | -1.768898 |
| 28 | 8 | 0 | 2.200656  | 1.852543  | -3.079916 |
| 29 | 6 | 0 | -0.930624 | 2.731427  | 1.526316  |
| 30 | 8 | 0 | -1.385031 | 2.774714  | 2.784303  |
| 31 | 8 | 0 | -0.702003 | 3.713813  | 0.843675  |
| 32 | 6 | 0 | -1.624479 | 4.092507  | 3.329550  |
| 33 | 6 | 0 | -4.162003 | 1.261613  | -0.841822 |
| 34 | 6 | 0 | -4.703215 | -0.104600 | -1.063520 |
| 35 | 8 | 0 | -6.045593 | -0.066342 | -1.140464 |
| 36 | 6 | 0 | -6.698650 | -1.327057 | -1.394056 |
| 37 | 8 | 0 | -4.048267 | -1.123267 | -1.205284 |
| 38 | 6 | 0 | -2.971036 | 1.564076  | -0.308360 |
| 39 | 1 | 0 | -0.856307 | -4.224605 | 0.869048  |
| 40 | 1 | 0 | -0.911988 | -3.404181 | 2.419849  |
| 41 | 1 | 0 | 1.306988  | -2.680100 | 1.892858  |
| 42 | 1 | 0 | 0.940293  | -3.870543 | -0.702741 |
| 43 | 1 | 0 | -0.620061 | -3.747654 | -1.593350 |
| 44 | 1 | 0 | 0.918458  | -3.420160 | -2.438262 |
| 45 | 1 | 0 | -1.705716 | 1.041873  | -2.438741 |
| 46 | 1 | 0 | -1.885860 | -0.714099 | -2.540216 |
| 47 | 1 | 0 | 0.435964  | -0.748919 | -2.784368 |
| 48 | 1 | 0 | -0.460899 | 0.668711  | 1.872203  |
| 49 | 1 | 0 | -0.002192 | 1.950415  | -0.867322 |
| 50 | 1 | 0 | 5.672370  | -0.299466 | 2.064413  |
| 51 | 1 | 0 | 6.209054  | -0.347835 | 0.380628  |
| 52 | 1 | 0 | 4.775347  | -2.400575 | 1.672014  |
| 53 | 1 | 0 | 5.499379  | -0.265501 | -2.339113 |
| 54 | 1 | 0 | 4.335223  | 0.940621  | -2.975913 |
| 55 | 1 | 0 | 6.056645  | 1.382843  | -2.746165 |
| 56 | 1 | 0 | 3.351131  | 2.936132  | -1.813491 |
| 57 | 1 | 0 | 1.632382  | 3.042290  | -1.458603 |
| 58 | 1 | 0 | 1.380672  | 1.318465  | -3.062352 |

|    |   |   |           |           |           |
|----|---|---|-----------|-----------|-----------|
| 59 | 1 | 0 | -2.369507 | 4.619464  | 2.730528  |
| 60 | 1 | 0 | -0.696652 | 4.667107  | 3.347506  |
| 61 | 1 | 0 | -1.992224 | 3.926013  | 4.340171  |
| 62 | 1 | 0 | -4.805900 | 2.071945  | -1.169590 |
| 63 | 1 | 0 | -6.362152 | -1.744202 | -2.345476 |
| 64 | 1 | 0 | -6.482916 | -2.035517 | -0.591636 |
| 65 | 1 | 0 | -7.763260 | -1.102704 | -1.429605 |
| 66 | 1 | 0 | -2.693313 | 2.613715  | -0.284823 |

---

## 2b-2

Standard orientation:

| Center<br>Number | Atomic<br>Number | Atomic<br>Type | Coordinates (Angstroms) |           |           |
|------------------|------------------|----------------|-------------------------|-----------|-----------|
|                  |                  |                | X                       | Y         | Z         |
| 1                | 6                | 0              | -1.896983               | 0.730275  | 0.264529  |
| 2                | 6                | 0              | -1.268136               | -1.963052 | 0.915911  |
| 3                | 8                | 0              | -2.788380               | -0.041155 | 1.063505  |
| 4                | 6                | 0              | -0.866114               | -0.033654 | -0.666421 |
| 5                | 6                | 0              | -0.624716               | -1.437414 | -0.159034 |
| 6                | 6                | 0              | -2.469559               | -1.304106 | 1.442979  |
| 7                | 8                | 0              | -3.237417               | -1.870205 | 2.208106  |
| 8                | 6                | 0              | -0.948270               | -3.255963 | 1.640973  |
| 9                | 8                | 0              | -1.821683               | -4.333787 | 1.307647  |
| 10               | 8                | 0              | 0.310442                | -2.042600 | -0.922911 |
| 11               | 6                | 0              | 0.410551                | -3.483453 | -1.039361 |
| 12               | 6                | 0              | -1.072276               | -0.009148 | -2.196484 |
| 13               | 8                | 0              | 0.161101                | -0.142938 | -2.903386 |
| 14               | 6                | 0              | -0.672927               | 1.320391  | 1.056119  |
| 15               | 6                | 0              | 0.220784                | 1.010388  | -0.162028 |
| 16               | 6                | 0              | 1.641554                | 0.605323  | 0.059091  |
| 17               | 6                | 0              | 4.143917                | -0.440877 | 0.743142  |
| 18               | 8                | 0              | 1.757795                | -0.285475 | 1.076050  |
| 19               | 6                | 0              | 2.728771                | 1.035800  | -0.640605 |
| 20               | 6                | 0              | 4.010160                | 0.461710  | -0.280027 |
| 21               | 6                | 0              | 2.971249                | -0.833264 | 1.490610  |
| 22               | 8                | 0              | 2.930215                | -1.601890 | 2.435479  |
| 23               | 6                | 0              | 5.449466                | -1.045970 | 1.227599  |
| 24               | 8                | 0              | 6.469549                | -1.162440 | 0.249815  |
| 25               | 8                | 0              | 5.128530                | 0.896854  | -0.943396 |
| 26               | 6                | 0              | 5.298637                | 0.370143  | -2.288188 |
| 27               | 6                | 0              | 2.626979                | 2.098364  | -1.721213 |
| 28               | 8                | 0              | 2.385138                | 1.583692  | -3.025622 |
| 29               | 6                | 0              | -0.715024               | 2.755872  | 1.527176  |
| 30               | 8                | 0              | -1.190718               | 2.847239  | 2.774581  |

|    |   |   |           |           |           |
|----|---|---|-----------|-----------|-----------|
| 31 | 8 | 0 | -0.383968 | 3.709719  | 0.845820  |
| 32 | 6 | 0 | -1.319655 | 4.184164  | 3.310629  |
| 33 | 6 | 0 | -3.917920 | 1.590725  | -1.044681 |
| 34 | 6 | 0 | -4.600770 | 0.289735  | -1.268441 |
| 35 | 8 | 0 | -5.918947 | 0.481663  | -1.452771 |
| 36 | 6 | 0 | -6.696987 | -0.703178 | -1.720245 |
| 37 | 8 | 0 | -4.064035 | -0.803558 | -1.327642 |
| 38 | 6 | 0 | -2.735891 | 1.772523  | -0.440838 |
| 39 | 1 | 0 | -1.000072 | -3.041610 | 2.715701  |
| 40 | 1 | 0 | 0.066835  | -3.587038 | 1.432930  |
| 41 | 1 | 0 | -2.703965 | -4.034483 | 1.577722  |
| 42 | 1 | 0 | -0.544814 | -3.955413 | -0.807276 |
| 43 | 1 | 0 | 0.688856  | -3.673545 | -2.075924 |
| 44 | 1 | 0 | 1.195746  | -3.854160 | -0.378777 |
| 45 | 1 | 0 | -1.485820 | 0.955144  | -2.493263 |
| 46 | 1 | 0 | -1.782009 | -0.787318 | -2.492657 |
| 47 | 1 | 0 | 0.549144  | -0.986663 | -2.622721 |
| 48 | 1 | 0 | -0.451995 | 0.657809  | 1.893218  |
| 49 | 1 | 0 | 0.190837  | 1.857629  | -0.846655 |
| 50 | 1 | 0 | 5.238393  | -2.054681 | 1.591672  |
| 51 | 1 | 0 | 5.799073  | -0.469103 | 2.099766  |
| 52 | 1 | 0 | 6.616398  | -0.270090 | -0.095531 |
| 53 | 1 | 0 | 6.135063  | 0.922449  | -2.716814 |
| 54 | 1 | 0 | 5.544307  | -0.693574 | -2.224048 |
| 55 | 1 | 0 | 4.395899  | 0.524992  | -2.882232 |
| 56 | 1 | 0 | 3.578676  | 2.631540  | -1.769478 |
| 57 | 1 | 0 | 1.865621  | 2.834919  | -1.435255 |
| 58 | 1 | 0 | 1.560829  | 1.056503  | -2.996089 |
| 59 | 1 | 0 | -0.343838 | 4.671933  | 3.344613  |
| 60 | 1 | 0 | -1.720437 | 4.056982  | 4.314372  |
| 61 | 1 | 0 | -2.001913 | 4.773562  | 2.695320  |
| 62 | 1 | 0 | -4.440256 | 2.458616  | -1.435220 |
| 63 | 1 | 0 | -6.341628 | -1.193288 | -2.629030 |
| 64 | 1 | 0 | -6.628798 | -1.400443 | -0.882652 |
| 65 | 1 | 0 | -7.721352 | -0.357443 | -1.847150 |
| 66 | 1 | 0 | -2.340786 | 2.783825  | -0.423886 |

---

## References

[1] Frisch, M. J.; Trucks, G. W.; Schlegel, H. B.; Scuseria, G. E.; Robb, M. A.; Cheeseman, J. R.; Scalmani, G.; Barone, V.; Mennucci, B.; Petersson, G. A.; Nakatsuji, H.; Caricato, M.; Li, X.; Hratchian, H. P.; Izmaylov, A. F.; Bloino, J.; Zheng, G.; Sonnenberg, J. L.; Hada, M.; Ehara, M.; Toyota, K.; Fukuda, R.; Hasegawa, J.; Ishida,

M.; Nakajima, T.; Honda, Y.; Kitao, O.; Nakai, H.; Vreven, T.; Montgomery, J. A., Jr.; Peralta, J. E.; Ogliaro, F.; Bearpark, M.; Heyd, J. J.; Brothers, E.; Kudin, K. N.; Staroverov, V. N.; Kobayashi, R.; Normand, J.; Raghavachari, K.; Rendell, A.; Burant, J. C.; Iyengar, S. S.; Tomasi, J.; Cossi, M.; Rega, N.; Millam, J. M.; Klene, M.; Knox, J. E.; Cross, J. B.; Bakken, V.; Adamo, C.; Jaramillo, J.; Gomperts, R.; Stratmann, R. E.; Yazyev, O.; Austin, A. J.; Cammi, R.; Pomelli, C.; Ochterski, J. W.; Martin, R. L.; Morokuma, K.; Zakrzewski, V. G.; Voth, G. A.; Salvador, P.; Dannenberg, J.J.; Dapprich, S.; Daniels, A.D.; Farkas, O.; Foresman, J. B.; Ortiz, J. V.; Cioslowski, J.; Fox, D. J. Gaussian 09, Revision C1; Gaussian, Inc.: Wallingford, CT, 2010.

[2]. Bruhn, T.; Hemberger, Y.; Schaumlöffel, A.; Bringmann, G. *Spec Dis*, version 1.51, University of Würzburg, Germany, 2010.

[3] Bruhn, T.; Schaumlöffel, A.; Hemberger, Y.; Bringmann, G. Quantifying the Comparison of Calculated and Experimental Electronic Circular Dichroism Spectra, *Chirality* 2013, 25, 243–249.

**Table S5.** 2D Structures of **1** and **2**.

| label     | structure                                                                                                                                                                                                                                                                                                                                                                                                                                                                       |
|-----------|---------------------------------------------------------------------------------------------------------------------------------------------------------------------------------------------------------------------------------------------------------------------------------------------------------------------------------------------------------------------------------------------------------------------------------------------------------------------------------|
| <b>1a</b> | 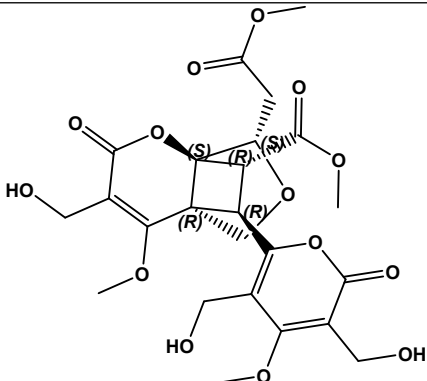 <p>The structure of compound 1a is a complex polycyclic molecule. It features a central bicyclic core with several stereocenters labeled with (R) and (S) configurations. The molecule is substituted with various groups, including hydroxyl groups (HO-), methoxy groups (-OCH3), and a methyl ester group (-COOCH3). The stereochemistry is indicated with wedged and dashed bonds.</p> |

1b

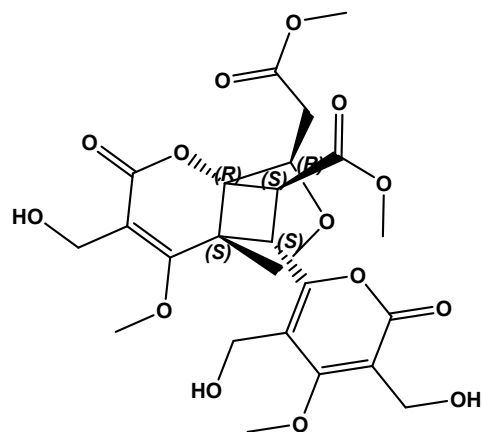

2b

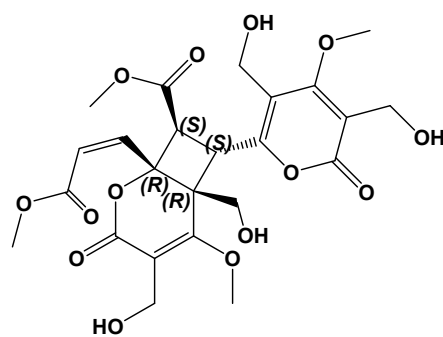

2a

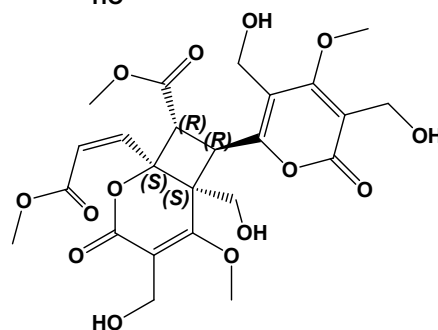

**Table S6** B3LYP/6-31++G (d, p) optimized lowest energy 3D conformers of **1a**.

| label       | conformer                                                                            | Boltzmann weighting factors |
|-------------|--------------------------------------------------------------------------------------|-----------------------------|
| <b>1a-1</b> | 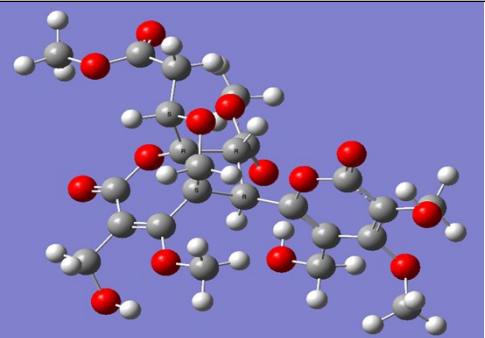 | 9.5                         |

|             |                                                                                      |       |
|-------------|--------------------------------------------------------------------------------------|-------|
| <b>1a-2</b> | 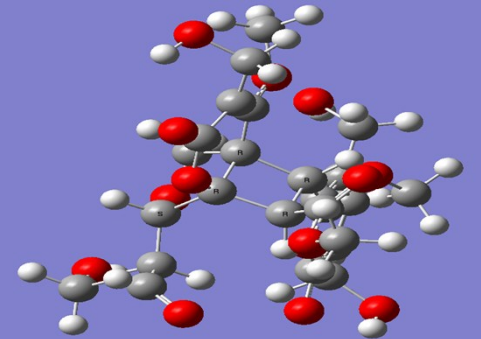   | 14.37 |
| <b>1a-3</b> |    | 0.37  |
| <b>1a-4</b> |   | 75.72 |
| <b>1a-5</b> |  | 0.04  |

**Table S7** B3LYP/6-31++G (d, p) optimized lowest energy 3D conformers of **2b**.

| label | conformer | Boltzmann weighting factors |
|-------|-----------|-----------------------------|
|-------|-----------|-----------------------------|

|      |                                                                                    |       |
|------|------------------------------------------------------------------------------------|-------|
| 2b-1 | 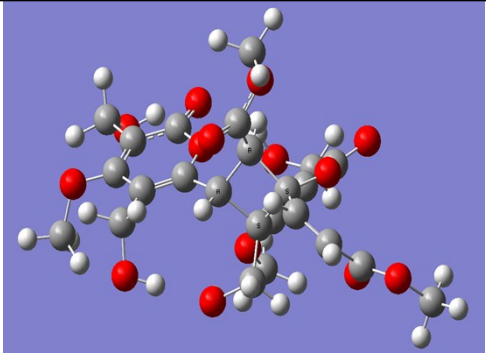 | 99.69 |
| 2b-2 |  | 0.31  |

## 6. X-ray Crystallographic analyses of 1

X-ray quality crystal was cultivated upon slow evaporation of the MeOH by keeping the sample at room temperature for one month. Crystal data of **2**:  $C_{24}H_{28}O_{14}$ ,  $M = 540.46$ , monoclinic,  $a = 11.6079(8) \text{ \AA}$ ,  $b = 8.1273(3) \text{ \AA}$ ,  $c = 25.7149(10) \text{ \AA}$ ,  $\beta = 92.286(4)^\circ$ ,  $U = 2424.0(2) \text{ \AA}^3$ ,  $T = 106.4$ , space group  $P2_1/c$ ,  $Z = 4$ ,  $\mu$  (Cu  $K\alpha$ ) = 1.061, 11660 reflections measured, 4577 unique ( $R_{\text{int}} = 0.0268$ ) which were used in all calculations. The final  $wR$  ( $F_2$ ) was 0.1371 (all data).

X-ray crystal data for compound **1**

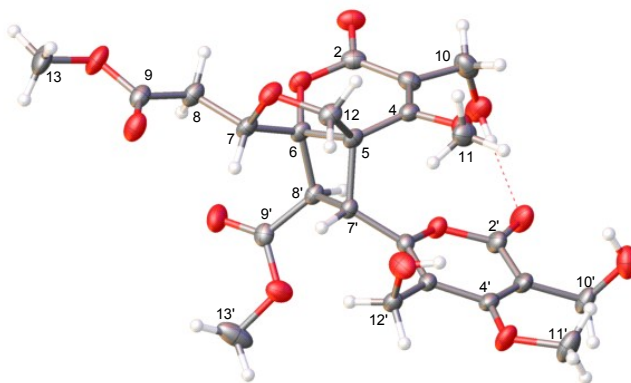

|                                                               |                                                 |
|---------------------------------------------------------------|-------------------------------------------------|
| Identification code                                           | exp_4022                                        |
| Empirical formula                                             | C <sub>24</sub> H <sub>28</sub> O <sub>14</sub> |
| Formula weight                                                | 540.46                                          |
| Temperature / K                                               | 106.4                                           |
| Crystal system                                                | monoclinic                                      |
| Space group                                                   | P2 <sub>1</sub> /c                              |
| a / Å, b / Å, c / Å                                           | 11.6079(8), 8.1273(3), 25.7149(10)              |
| α/°, β/°, γ/°                                                 | 90.00, 92.286(4), 90.00                         |
| Volume / Å <sup>3</sup>                                       | 2424.0(2)                                       |
| Z                                                             | 4                                               |
| ρ <sub>calc</sub> / mg mm <sup>-3</sup>                       | 1.481                                           |
| μ / mm <sup>-1</sup>                                          | 1.061                                           |
| F(000)                                                        | 1136                                            |
| Crystal size / mm <sup>3</sup>                                | 0.35 × 0.04 × 0.03                              |
| 2θ range for data collection                                  | 7.62 to 142.04°                                 |
| Index ranges                                                  | -8 ≤ h ≤ 14, -9 ≤ k ≤ 8, -31 ≤ l ≤ 31           |
| Reflections collected                                         | 11660                                           |
| Independent reflections                                       | 4577[R(int) =                                   |
| Data/restraints/parameters                                    | 4577/0/362                                      |
| Goodness-of-fit on F <sup>2</sup>                             | 1.029                                           |
| Final R indexes [ $I > 2\sigma(I)$ i.e. $F_o > 4\sigma$ (Fo)] | R1 = 0.0485, wR2 = 0.1300                       |
| Final R indexes [all data]                                    | R1 = 0.0566, wR2 = 0.1371                       |
| Largest diff. peak/hole / e Å <sup>-3</sup>                   | 0.708/-0.314                                    |

The crystallographic data for the structure of **1** have been deposited with the Cambridge Crystallographic Data Center as supplementary publication CCDC No. 1504985.



## 7. The spectra of phomone A (1)

Figure S1. The UV spectrum of compound 1

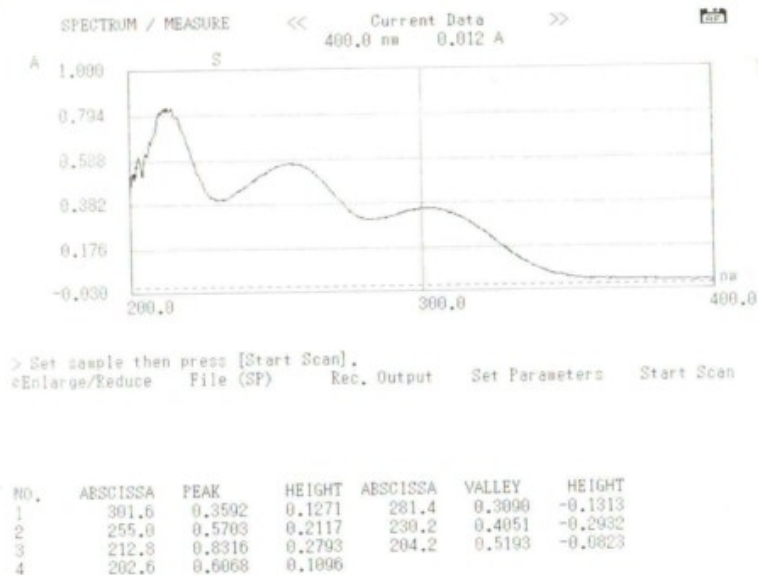

Figure S2. The IR spectrum of compound 1

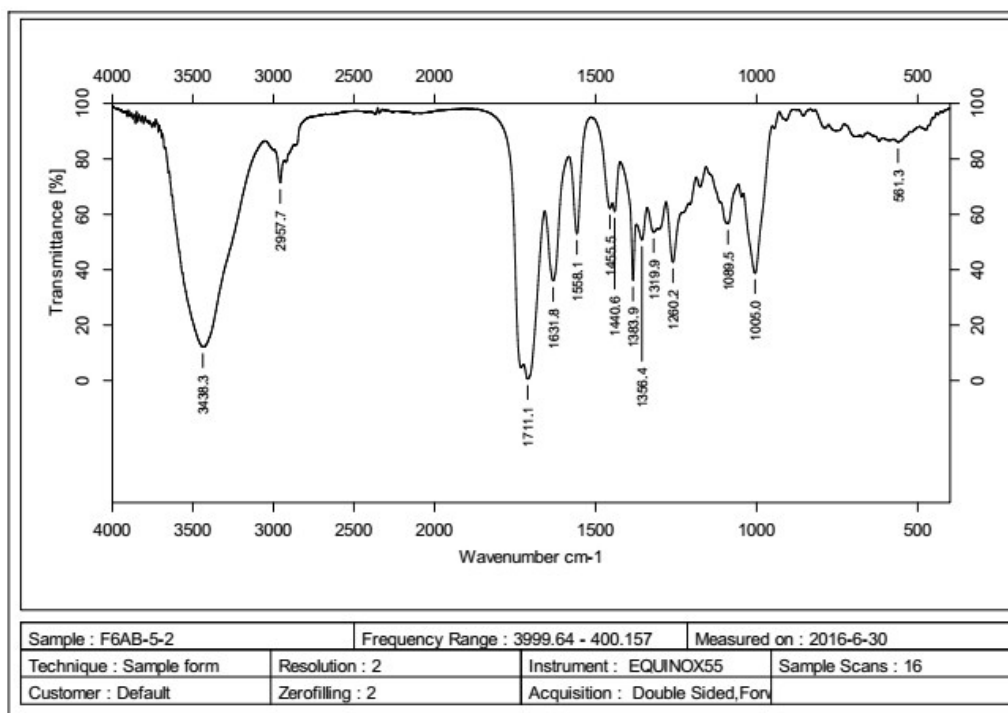

**Figure S3.** The HR-ESI-MS spectrum of compound **1**

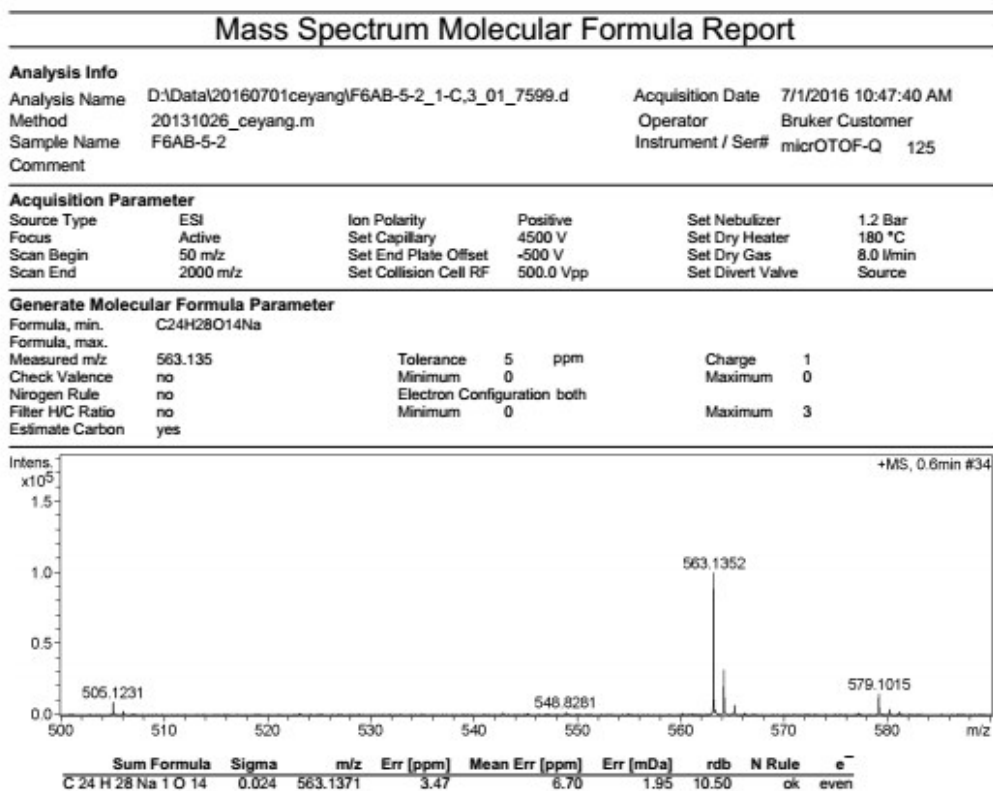

Figure S4. The  $^1\text{H}$ -NMR spectrum of compound 1

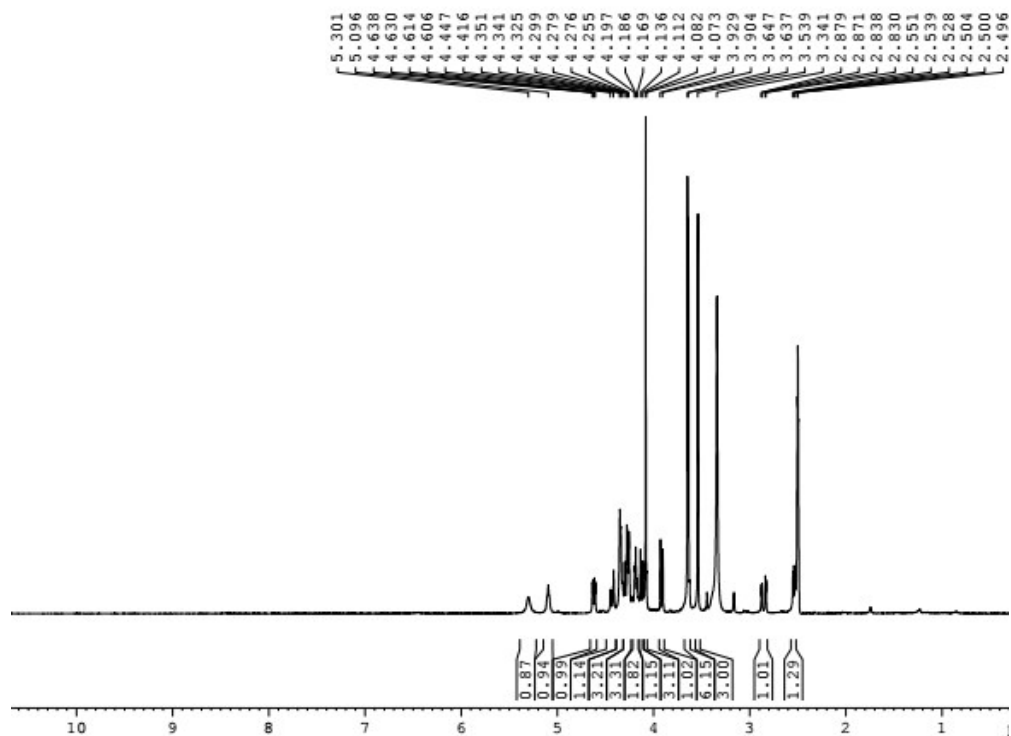

Figure S5. The  $^{13}\text{C}$ -NMR spectrum of compound 1

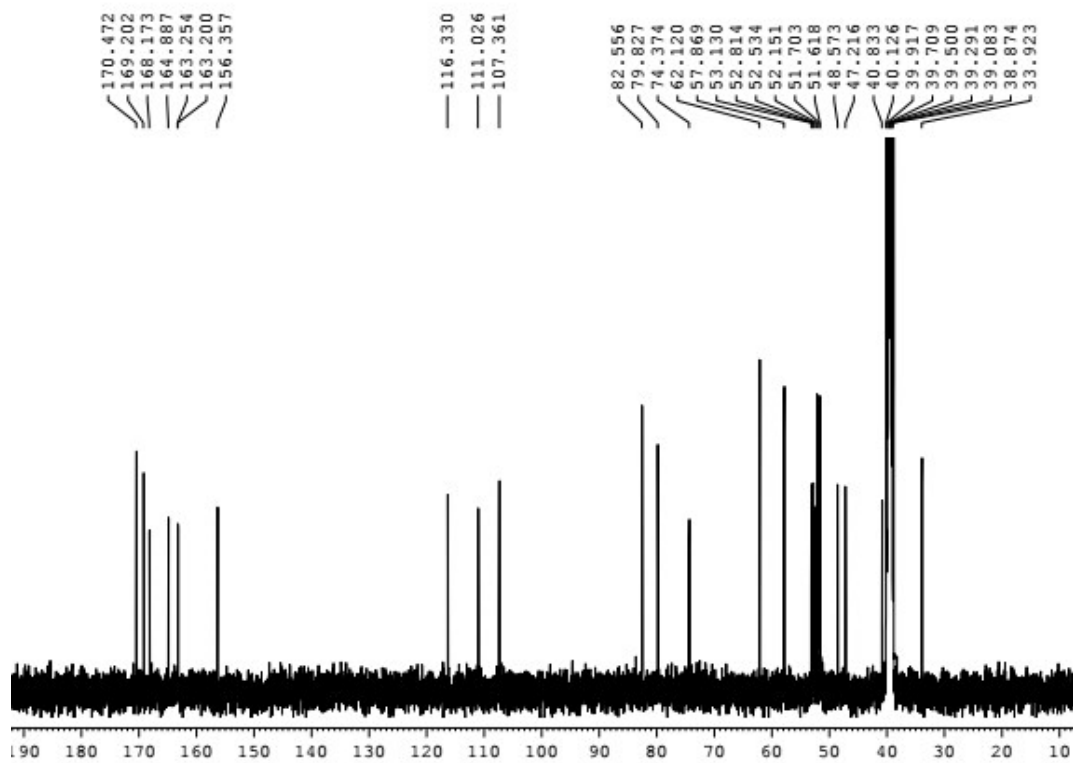

Figure S6. The HSQC spectrum of compound 1

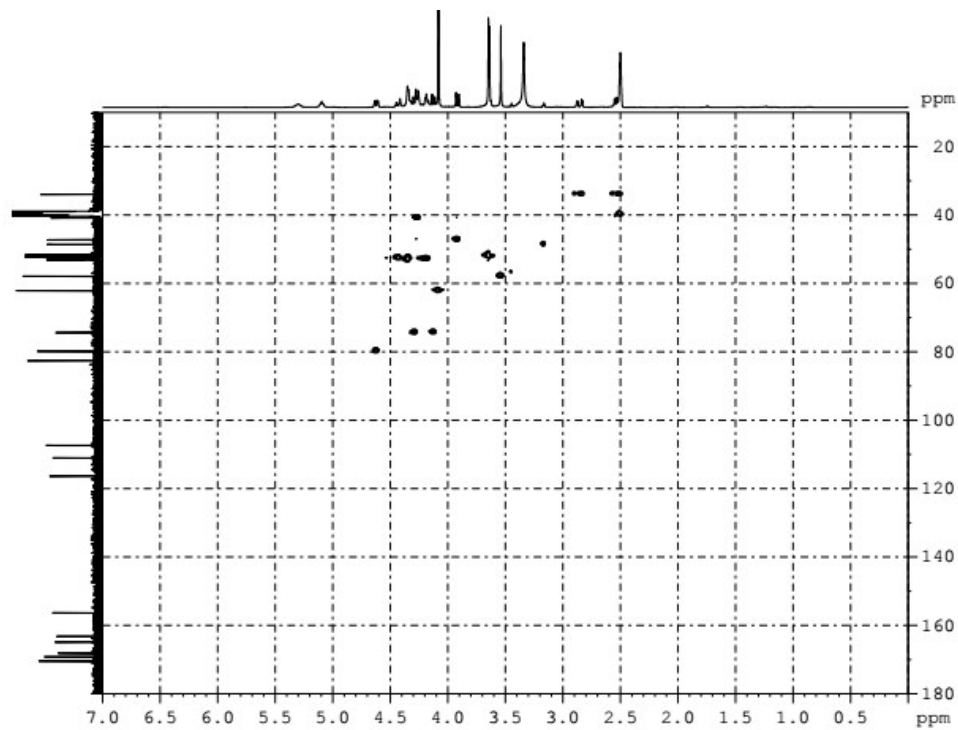

Figure S7. The HMBC spectrum of compound 1

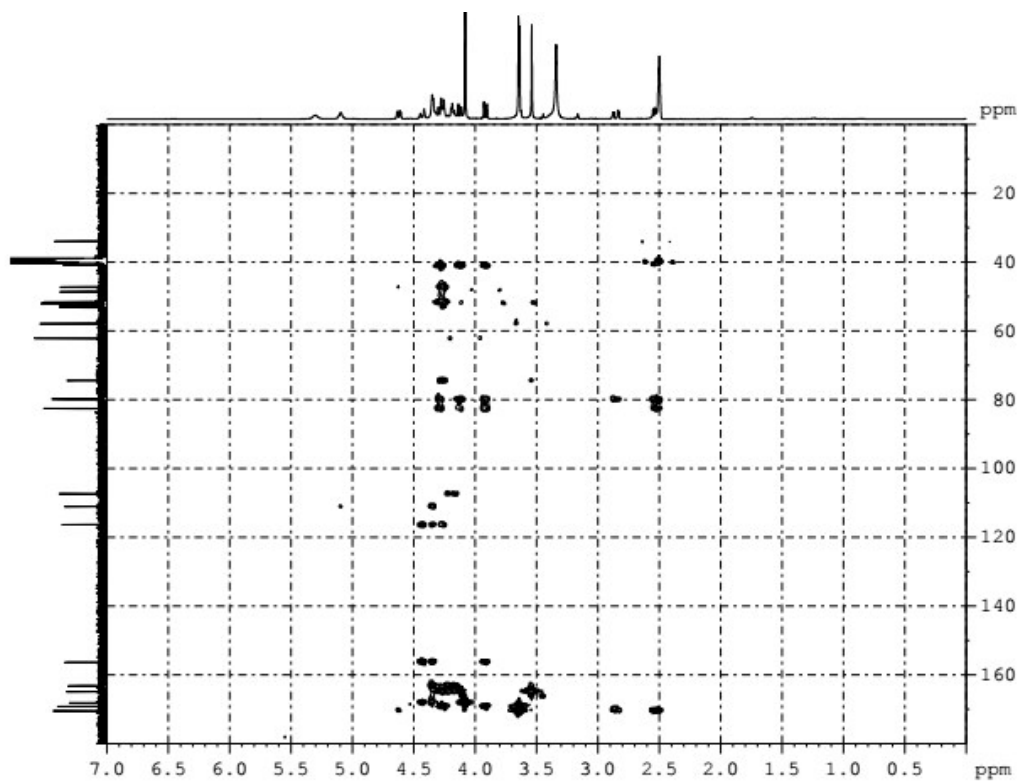

**Figure S8.** The NOESY spectrum of compound **1**

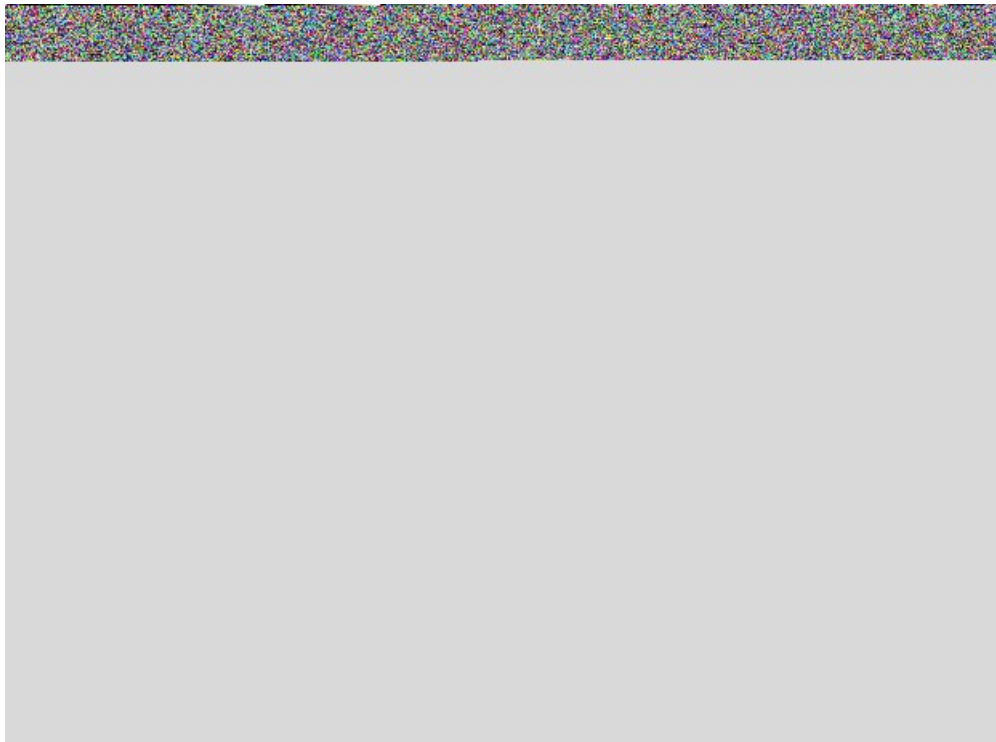

## 8. The spectra of phomone B (2)

**Figure S9.** The UV spectrum of compound **2**

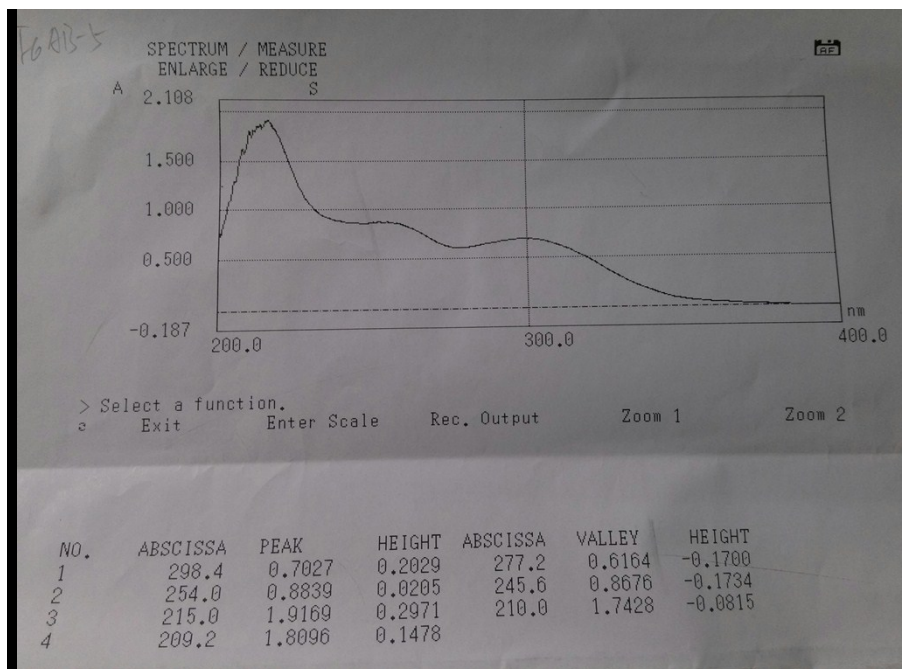

**Figure S10.** The IR spectrum of compound **2**

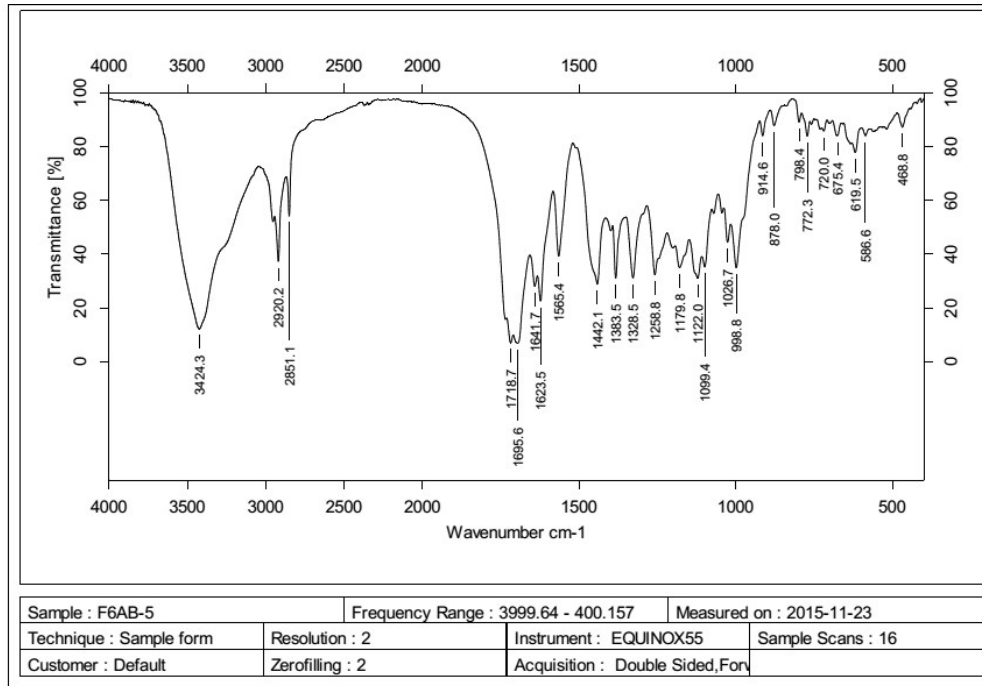

**Figure S11.** The HR-ESI-MS spectrum of compound **2**

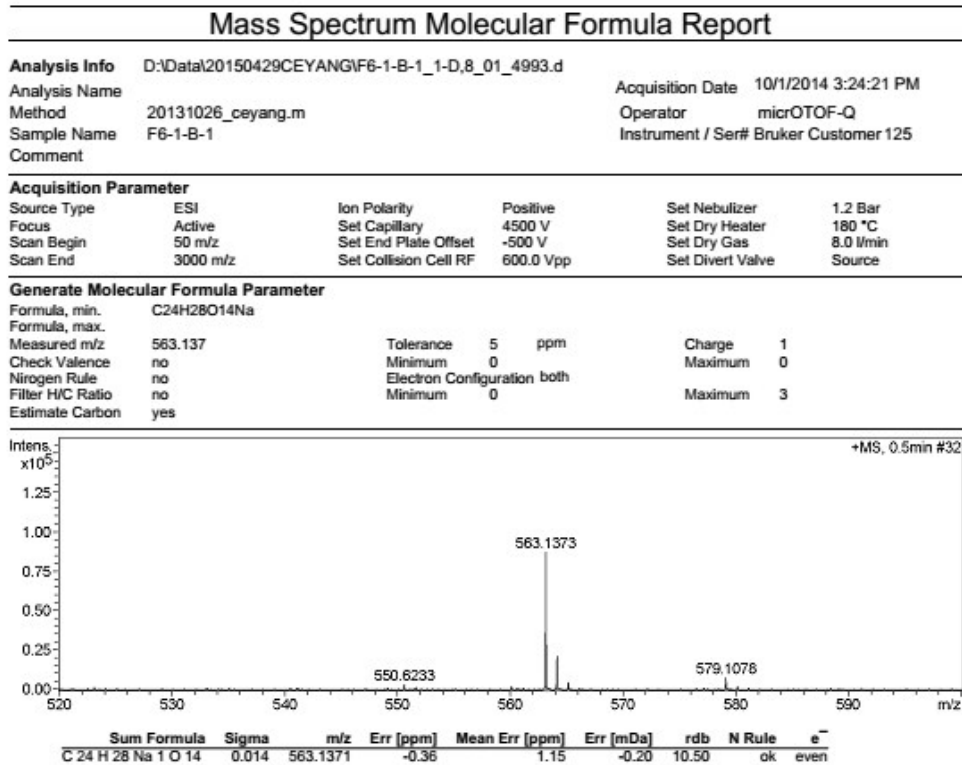

Figure S12. The  $^1\text{H-NMR}$  spectrum of compound **2**

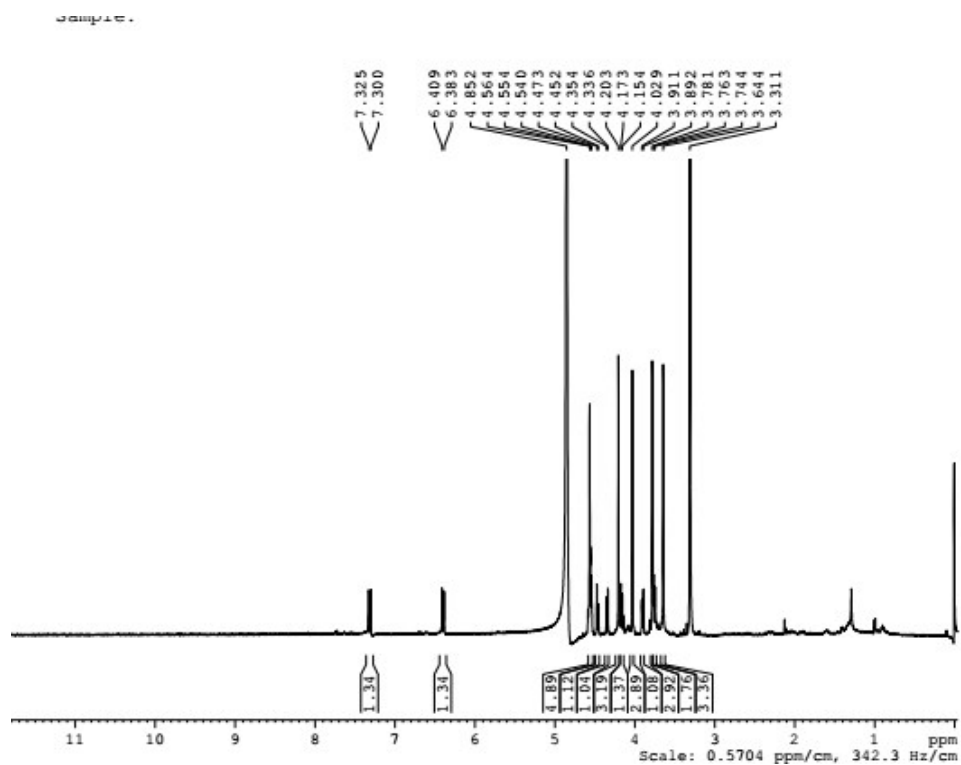

Figure S13. The  $^{13}\text{C-NMR}$  spectrum of compound **2**

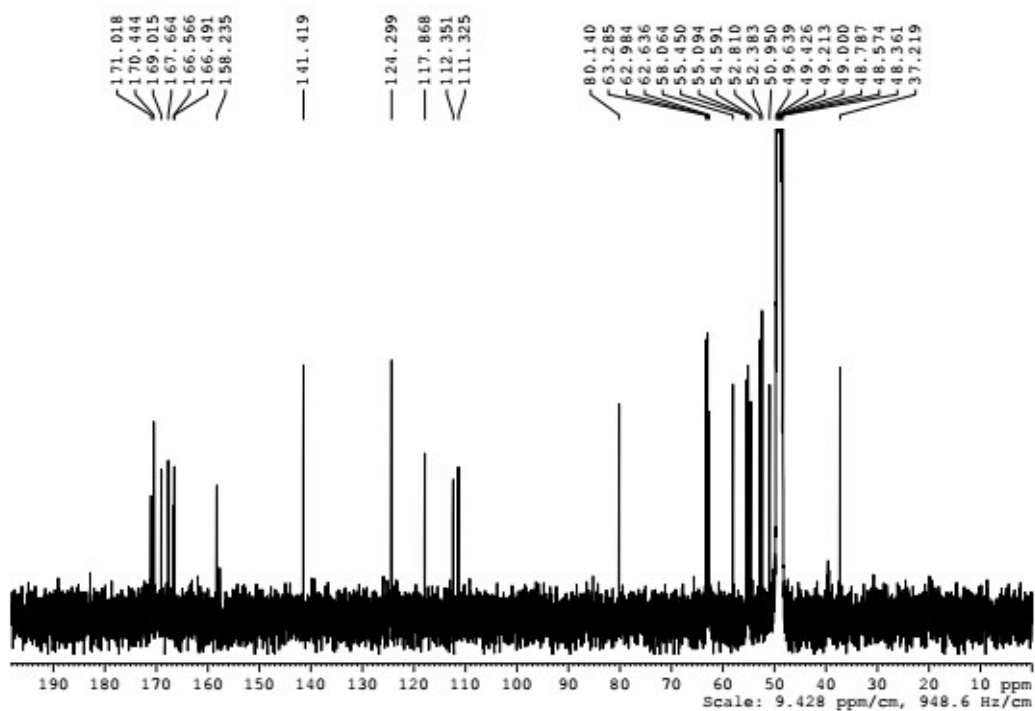

**Figure S14.** The HSQC spectrum of compound **2**

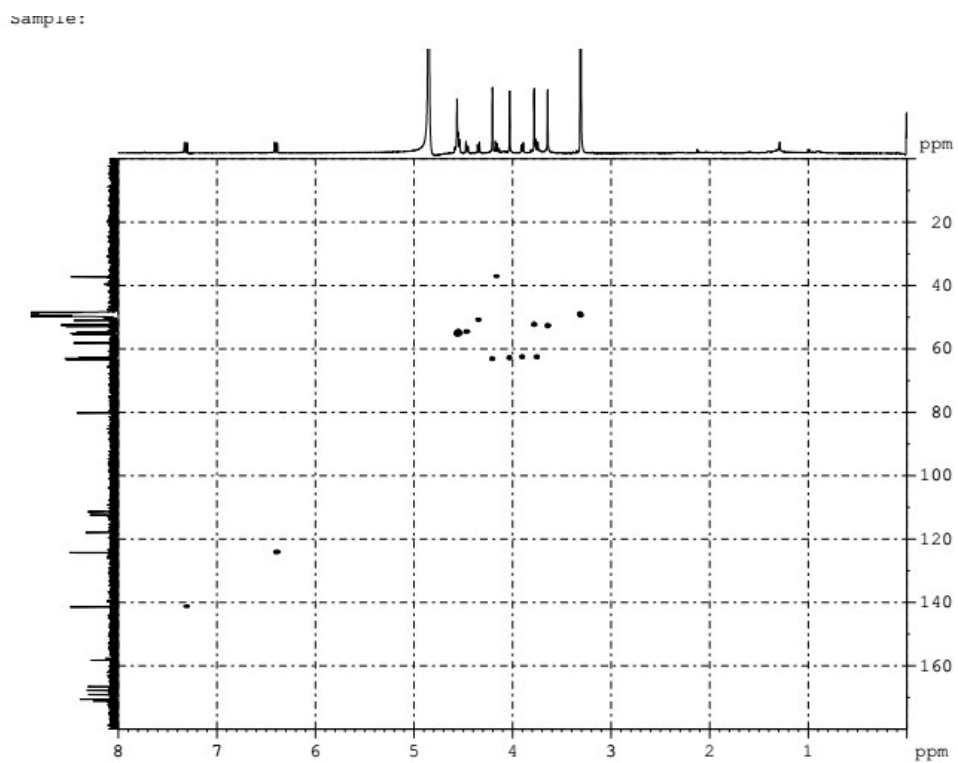

**Figure S15.** The HMBC spectrum of compound **2**

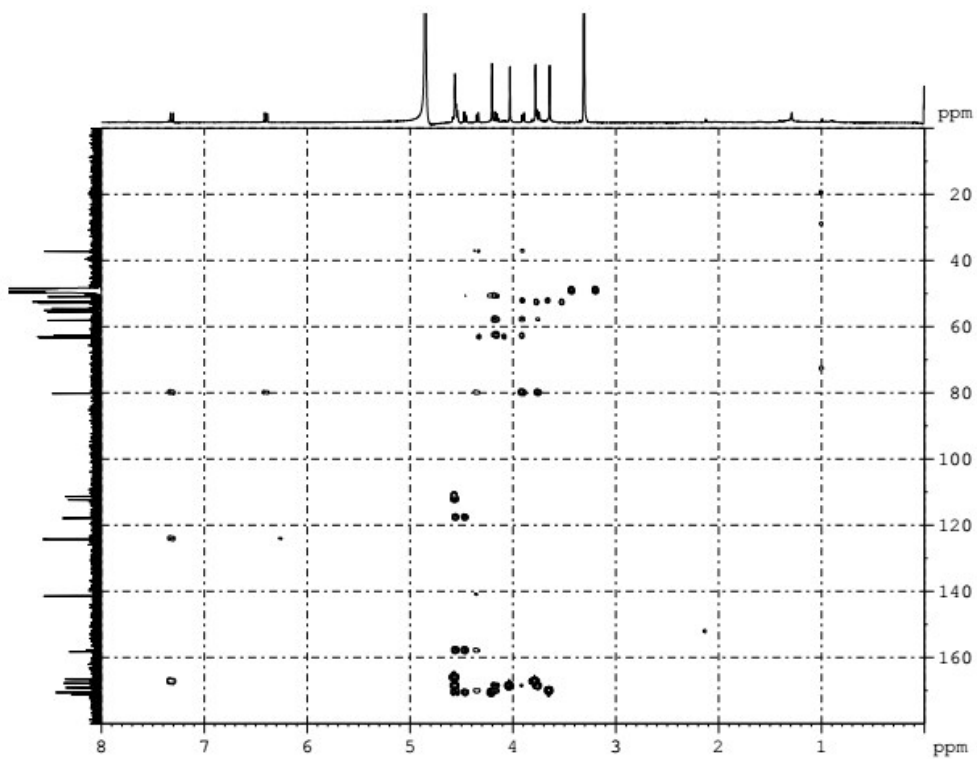



Figure S16. The NOESY spectrum of compound 2

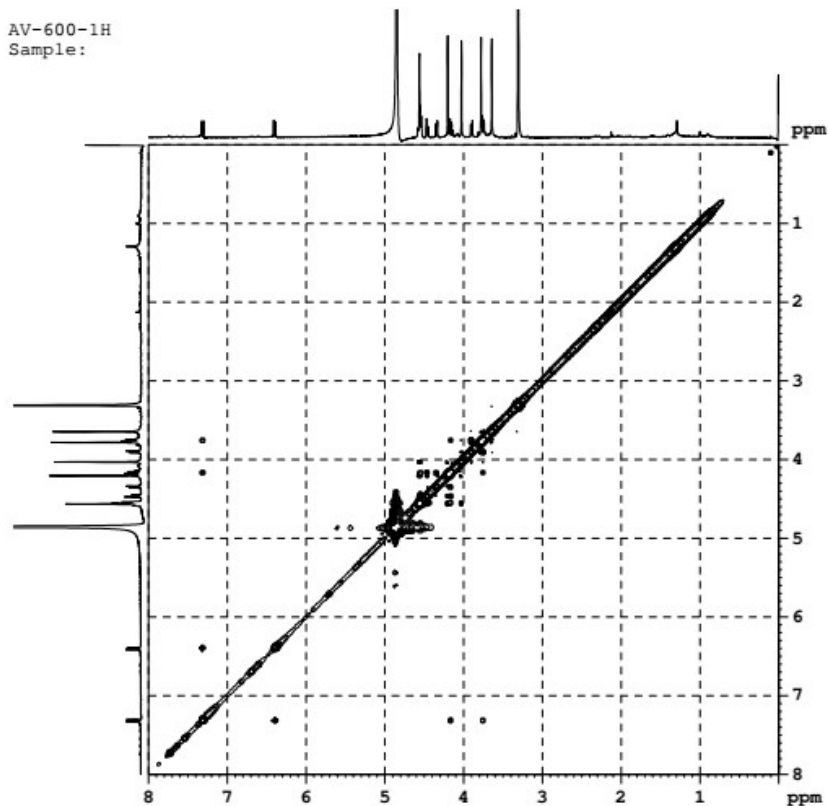

## 8. The spectra of compound 4

Figure S17. The <sup>1</sup>H-NMR spectrum of compound 4

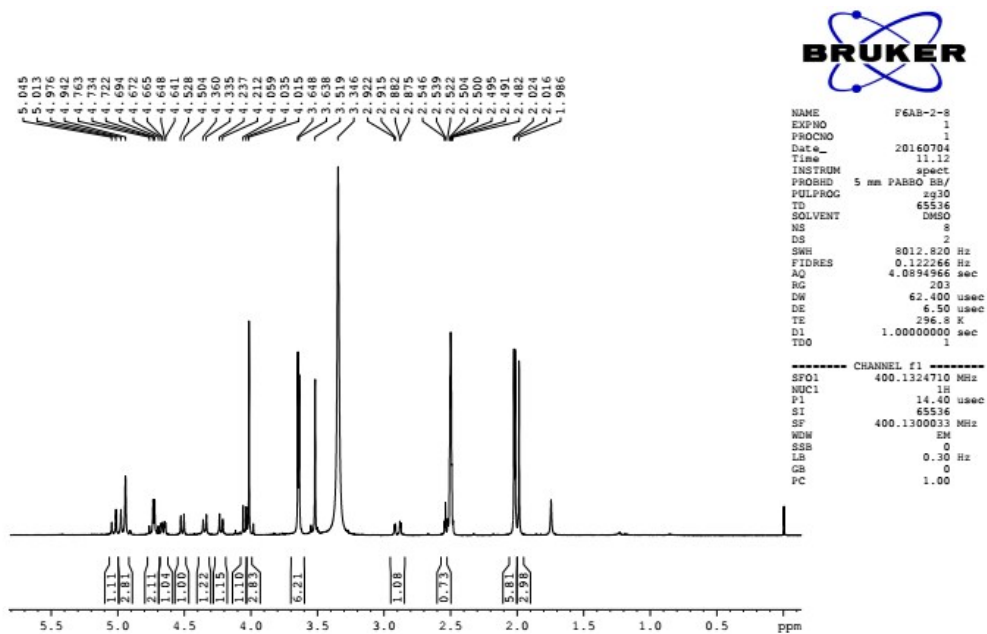

Figure S18. The  $^{13}\text{C}$  NMR spectrum of compound 4

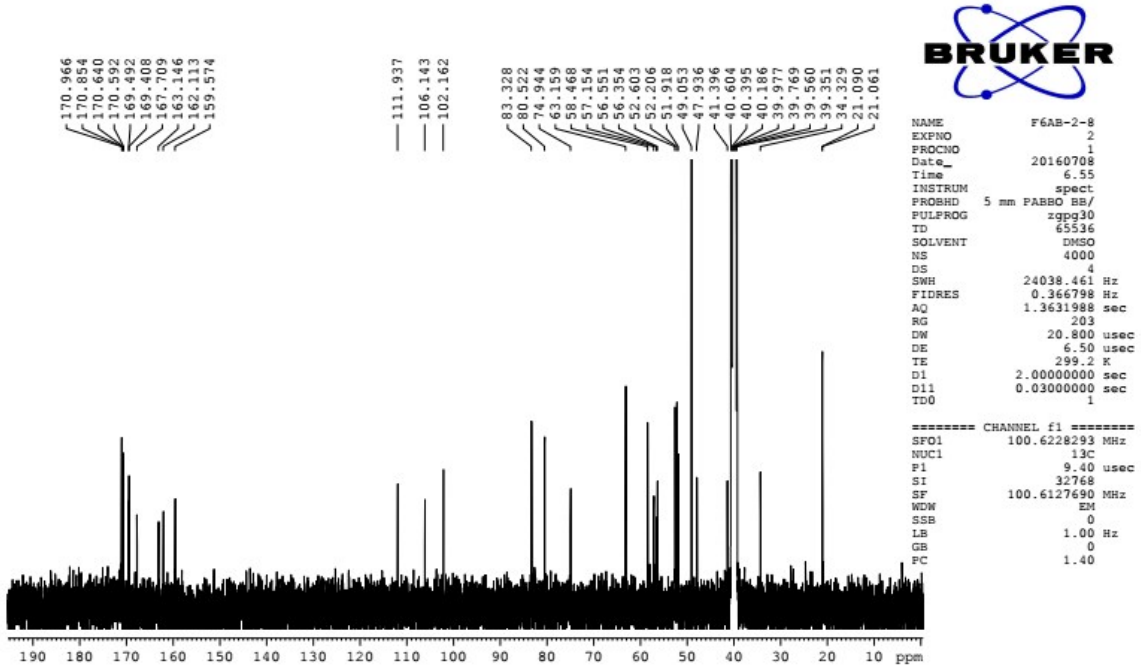

Figure S19. The ESI-MS spectrum of compound 4

### Direct Mass Spectrometry Analysis

Analysis Name: 16092211.d  
Sample Name: F6AB-2-8

Instrument: LC-MSD-Trap-SL  
Operator: Administrator

Print Date: 9/22/2016 9:45:32 AM  
Acq. Date: 9/22/2016 9:38:41 AM

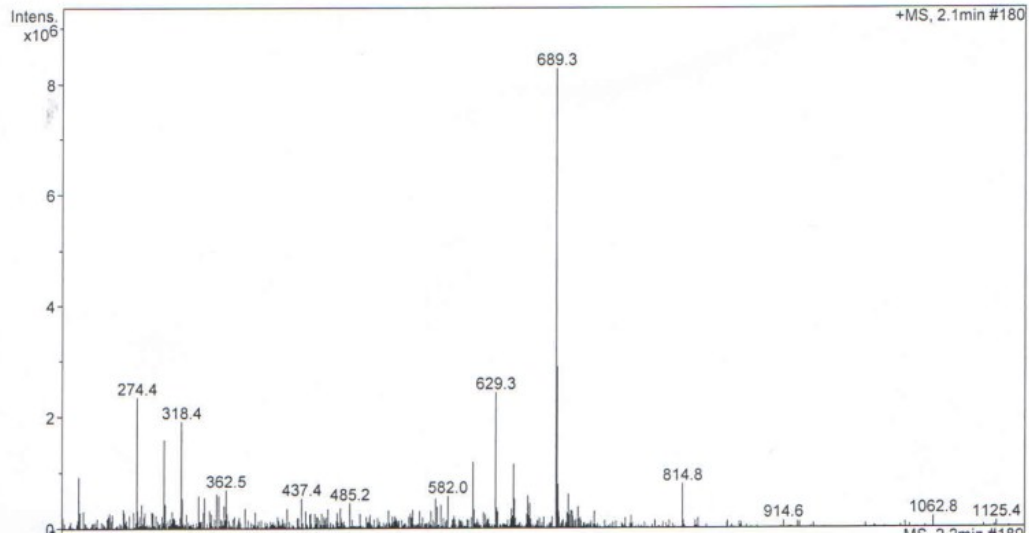

**Figuer S20.** Experimental ECD spectra of **4a** and **4b**

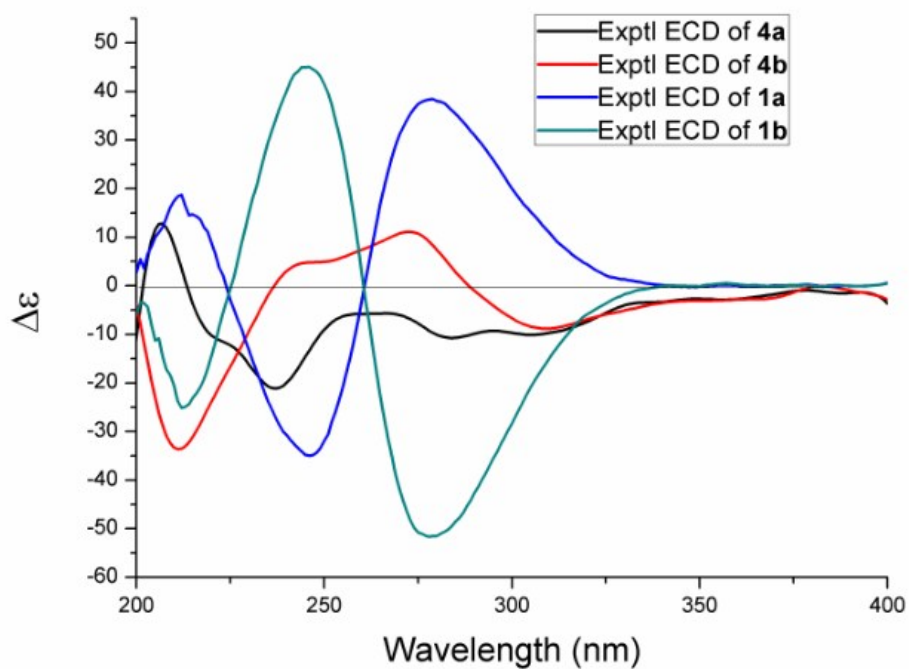

## 9. H<sub>2</sub>O-, pH- and temperature-dependent epimerization effect

H<sub>2</sub>O-dependent epimerization effect:

**Figure S21.** Dynamic chiral HPLC spectra of **2** dissolved in H<sub>2</sub>O heating at 28 °C

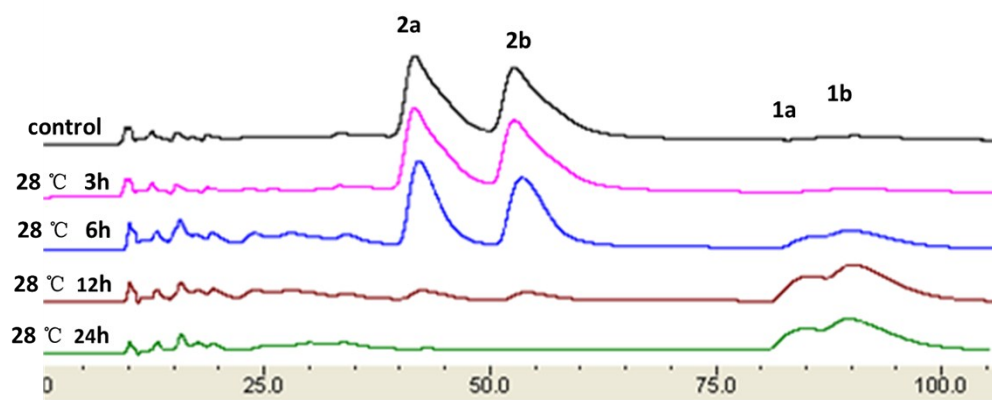

**pH-dependent epimerization effect:**

**Figure S22.** Dynamic chiral HPLC spectra of compound **2** dissolved in anhydrous ethanol at pH = 8.0, 7.0, 5.0.

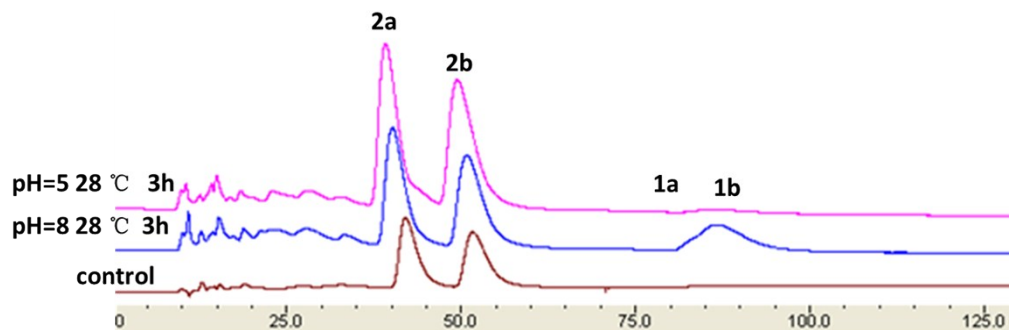

**Figure S23.** Dynamic chiral HPLC spectra of compound **1** dissolved in anhydrous ethanol at pH = 8.0, 7.0, 5.0.

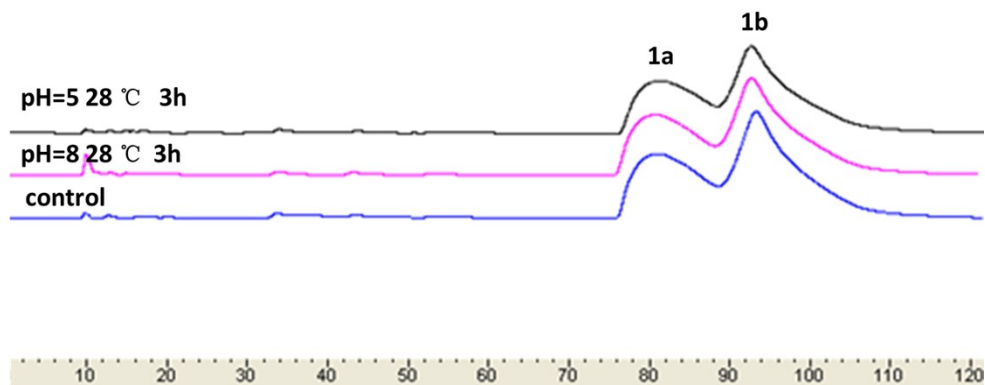

**Figure S24.** Chiral HPLC chromatogram of **2** dissolved in the H<sub>2</sub>O at pH = 8.0, 7.0, 5.0.

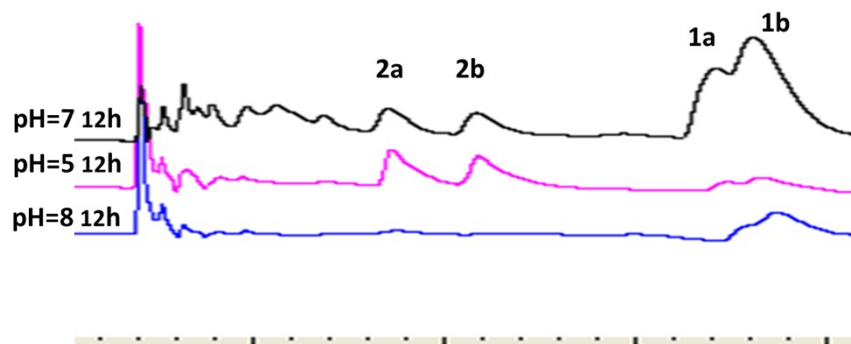

**Temperature-dependent epimerization effect:**

**Figure S25.** Dynamic chiral HPLC spectra: a) **2** dissolved in anhydrous ethanol heating at 50 °C

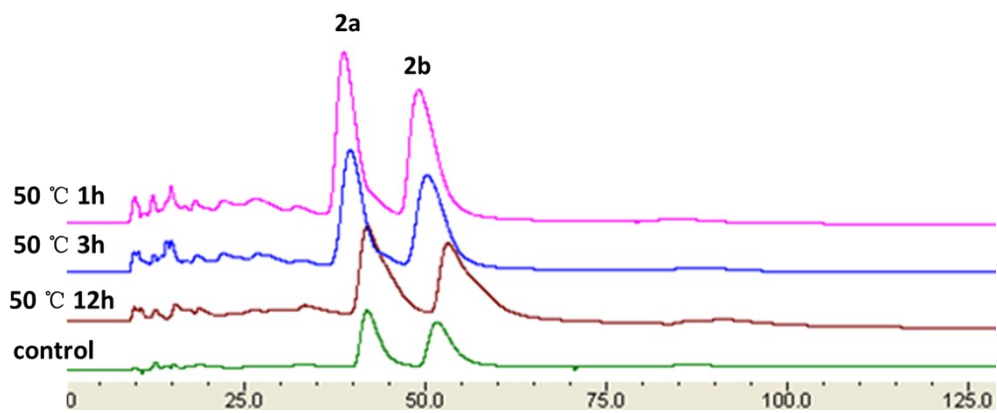

Supplement: c6ra26319d1.pdf [file c6ra26319d1.pdf]
